# Supplementary material for: Photothermal effect enables markedly enhanced oxygen reduction and evolution activities for high-performance Zn–air batteries
Source: Royal Society of Chemistry journal article supplement (doi:10.1039/d1ta03652a), 2021-01-01
Supplement: d1ta03652a2.pdf [file d1ta03652a2.pdf]

**Supporting Information**

**Photothermal Effect Enables Markedly Enhanced Oxygen Reduction  
and Evolution Activities for High-Performance Zn–Air Batteries**

*Xiaoyan Zhang,<sup>a</sup> Shuang Pan,<sup>a</sup> Huanhuan Song,<sup>a</sup> Wengai Guo,<sup>a</sup> Fan Gu,<sup>a</sup> Chengzhan Yan,<sup>a</sup> Huile Jin,<sup>a</sup> Lijie Zhang,<sup>a</sup> Yihuang Chen,<sup>\*a</sup> and Shun Wang,<sup>\*a</sup>*

<sup>a</sup>College of Chemistry and Materials Engineering, Institute of New Materials and Industrial Technologies, Wenzhou University, Wenzhou 325035, PR China  
E-mail: yhchen@wzu.edu.cn; shunwang@wzu.edu.cn

## 1. Experimental Section

### 1.1 Materials Synthesis

#### *Synthesis of Graphene Oxide (GO)*

GO was prepared via a modified Hummers method.<sup>1,2</sup> Typically, 1g of graphite (99%+) was added into a 250 ml round-bottom flask, followed by adding 25 ml of 98% sulfuric acid. Then, the solution was stirred for 24 h at room temperature. Subsequently, 200 mg of  $\text{KMnO}_4$  was slowly added into the mixture solution and stirred for 5 min until 1g of  $\text{KMnO}_4$  was added. Meanwhile, the solution was kept under stirring for 30 min. Afterwards, 46 ml of deionized water (DIW) was added to the mixture drop by drop at the same time. After that, 140 ml of DIW and 10 ml of 30%  $\text{H}_2\text{O}_2$  were added to the mixture and stirred for 5 min. A vacuum was then pumped to remove the solution. The obtained was washed with 180 ml of 5% HCl solution and enough DIW until the solution was neutral. After being washed with anhydrous ethanol, the obtained suspension was sonicated for 1 h followed by centrifugation at 3000 rpm for 5 min, yielding the final product.

#### *Synthesis of $\text{Co}_3\text{O}_4/\text{N-rGO}$*

To prepare  $\text{Co}_3\text{O}_4/\text{N-rGO}$ , 8 mg of GO was dispersed in 24 ml of anhydrous ethanol with ultrasonication for 12h. Subsequently, 48 mg of cobalt acetylacetonate ( $\text{Co}(\text{Ac})_2$ ), 0.5ml of ammonia water and 0.7 mL of DIW were added to the GO ethanol solution with ultrasonication for 30 min. The mixture solution was then stirred at 80°C for 10 h and transferred into a 50 mL stain steel autoclave at 150 °C for 3 h. The obtained suspension was sonicated for 30 min followed by centrifugation and washing with anhydrous ethanol and DIW for 3 times, yielding the final product.

#### *Synthesis of $\text{Co}_3\text{O}_4/\text{rGO}$ , $\text{N-rGO}$ , and $\text{Co}_3\text{O}_4$ nanoparticles.*

To prepare  $\text{Co}_3\text{O}_4/\text{rGO}$  hybrid without the addition of  $\text{NH}_4\text{OH}$ , the first step reaction mixture was prepared by adding 48 mg of  $\text{Co}(\text{Ac})_2$  and 1.2 ml of DIW to 24 ml of GO anhydrous ethanol suspension with ultrasonication for 30 min. The following steps were the same as those for the synthesis of  $\text{Co}_3\text{O}_4/\text{N-rGO}$ . The resultant  $\text{Co}_3\text{O}_4/\text{rGO}$  was dried, grounded and collected.

$\text{N-rGO}$  was synthesized by the thermal reduction of mixed powders containing GO and ammonia water. 8 mg of GO and 0.5 ml of ammonia water were dispersed in 24 ml of ethanol by ultrasonication for 30 min. The obtained solution was kept stirring at 80°C for 10 h and transferred into a 50 mL stain steel autoclave at 150 °C for 3 h. The following steps were the same as those for the synthesis of  $\text{Co}_3\text{O}_4/\text{N-rGO}$ .

$\text{Co}_3\text{O}_4$  nanoparticles were prepared through the same steps as those for  $\text{Co}_3\text{O}_4/\text{N-rGO}$  except the addition of GO.

### 1.2 Characterization

The morphology of GO and  $\text{Co}_3\text{O}_4/\text{N-rGO}$  was recorded by a field emission transmission electron microscopy (TEM) and High-Resolution transmission electron microscopy (HRTEM) on a JEOL 2100F instrument (operated at 200 kV). The crystalline structure of samples was obtained by XRD (Bruker D8 advanced). XRD samples were prepared by drop-casting their aqueous suspensions onto glass substrates. Thermal gravimetric analysis (TGA, Netzsch STA 449 f3) was utilized to measure the content of the hybrid nanosheets at a rate of 5°C min<sup>-1</sup> from 25 to 800 °C in air. The surface area and the porosity distribution of the samples were investigated via Brunauer-Emmett-Teller analysis. The elements and electronic status of the samples were determined via X-

ray photoelectron spectroscopy (XPS) measurements on SES 2002 at a power of 120W (8 Ma, 15 kV).

### 1.3 Electrochemical Measurements

#### *Cyclic voltammetry (CV)*

All electrochemical tests were conducted in the three-electrode cell using CHI760D electrochemical analyzer at room temperature. Rotary disk electrode (RDE) coated with catalysts, Ag/AgCl (3 M KCl) or Hg/HgO (1 M KOH) electrode and graphite rod were used as the working electrode, reference electrode and counter electrode, respectively. O<sub>2</sub>-saturated 0.1 M KOH and O<sub>2</sub>-saturated 1 M KOH served as the electrolytes for ORR and OER, respectively. In all measurements, the data was *iR* corrected and the Ag/AgCl or Hg/HgO was calibrated with respect to reversible hydrogen electrode (RHE). The measured potential of the Ag/AgCl electrode was converted to the potential versus to the reversible hydrogen electrode (RHE) based on  $E_{\text{RHE}} = E_{\text{Ag/AgCl}} + 0.21 + 0.0591 \text{ pH} \cdot iR$ . The measured potential of the Hg/HgO electrode was converted to the potential versus to the reversible hydrogen electrode (RHE) based on  $E_{\text{RHE}} = E_{\text{Hg/HgO}} + 0.098 + 0.0591 \text{ pH} \cdot iR$ .

#### *Rotating disk electrode (RDE) measurement*

The catalyst ink was prepared by dispersing 6 mg of the as-prepared catalyst with 12  $\mu\text{L}$  of Nafion, 200  $\mu\text{L}$  of ethanol, and 800  $\mu\text{L}$  of DIW in an ultrasonic bath for 1 h, and then 20  $\mu\text{L}$  of the dispersion (containing 0.118 mg catalyst) was transferred onto a glassy carbon electrode of 5 mm in diameter (loading amount: 0.60 mg  $\text{cm}^{-2}$ ). The as-prepared catalyst film was dried at room temperature. The scanning range of the OER system is 0 V  $\sim$  1.0 V (vs. Hg/HgO). The scanning range of the ORR system is -1.0 V  $\sim$  0 V (vs. Ag/AgCl), under various rotating speeds (400 rpm, 625 rpm, 900 rpm, 1225 rpm, 1600 rpm, 2025 rpm), and the scanning rate is 5  $\text{mV s}^{-1}$ . The transferred electron number (*n*) in ORR was calculated from the slope of Koutecky-Levich (K-L) plot as follows.

$$(1) J^{-1} = J_L^{-1} + J_K^{-1} = (B\omega^{1/2})^{-1} + J_K^{-1},$$

$$(2) B = 0.2nFC_0(D_0)^{2/3}\nu^{-1/6}$$

$$(3) J_K = nFkC_0$$

where *J* is the measured current density, *J<sub>K</sub>* is the kinetic current density,  $\omega$  is the rotation speed, *n* is the number of electron transfers, *A* is the effective area of the glassy carbon electrode, and *F* is Faraday Constant ( $F = 96485 \text{ C mol}^{-1}$ ),  $\nu$  is the kinetic viscosity ( $1.1 \times 10^{-2} \text{ cm}^2 \text{ s}^{-1}$ ), *C<sub>0</sub>* is the saturated concentration of oxygen in a 0.1 M KOH solution ( $1.2 \times 10^{-3} \text{ mol L}^{-1}$ ), and *D<sub>0</sub>* is the diffusion coefficient of oxygen in a 0.1 M KOH solution ( $1.9 \times 10^{-5} \text{ cm}^2 \text{ s}^{-1}$ ). According to the above equation, the relation between *J* and  $\omega$  can be obtained, and then the number of transferred electrons can be calculated. The EIS spectra of Co<sub>3</sub>O<sub>4</sub>/N-rGO were obtained at -0.2 V vs. Ag/AgCl and the frequency range varied from 0.01 to 100 kHz with 5 mV amplitude

#### *Rotating ring-disk electrode (RRDE) measurement*

RRDE measurement was carried out at the scan rate of 5  $\text{mV s}^{-1}$  under the 1,600 rpm rotating speed. The scan range is from 0  $\sim$  -1 V (vs. Ag/AgCl), and the ring potential is 1.5 V (vs. RHE). The following equations were used to calculate the percentage of H<sub>2</sub>O<sub>2</sub> and the transferred electron number (*n*).

$$\% HO_2^- = 200 \times \frac{I_r/N}{I_d + I_r/N}$$

$$n = 4 \times \frac{I_r}{I_d + I_r/N}$$

where  $I_d$  is disk current,  $I_r$  is ring current and  $N$  is current collection efficiency of the Pt ring which was determined to be 0.40 from the reduction of  $K_3Fe[CN]_6$ .

To compare the performance, commercial 20 wt% Pt/C and  $RuO_2$  catalysts were also studied, which prepared via same method and loading capacity.

#### *Photothermal experiment*

To scrutinize the photothermal-assisted performance, catalyst electrodes were irradiated with the 808 nm laser (MDL-H-808-5W) using a quartz reactor containing 0.1 or 1 M KOH solution. The temperature of the electrodes was tracked via an IR thermal camera (FLIR E50) until the electrode reached a steady temperature. As the electrode was immersed in electrolyte, there was a small temperature rise for the electrolyte near the surface of polytetrafluoroethylene (PTFE) due to the heat transfer between the electrode and its surrounding electrolyte, while the temperature of the rest of the electrolyte (i.e., major part) was almost unchanged. The temperature of the rest of the electrolyte was recorded as the temperature of the electrolyte. The reactor was put in a thermostatic water bath circulator, which guaranteed the temperature of electrolyte stay at room temperature. The irradiation power can be tuned in the range of 0–5.0 W cm<sup>-2</sup>.

#### *The fabrication and performance evaluation of the liquid rechargeable zinc–air batteries (ZABs)*

The ZAB was fabricated using zinc foil and  $Co_3O_4/N$ -rGO loaded carbon fiber paper as the anode and air electrode, respectively. When performing the ZAB measurement, a rectangle-shape of zinc (0.5 cm \* 0.8 cm) was cut and removed on zinc anode, forming a rectangle hole on the zinc foil (**Fig. 5a**). As such, the light, which came in from the direction of anode, was able to pass the zinc anode through the rectangle hole on the zinc foil and reached the air cathode side. 6 M KOH solution containing 0.2 M  $Zn(Ac)_2$  served as the electrolyte to ensure the reversible redox reaction of Zn anode. The catalyst loading on air electrode was 1.0 mg cm<sup>-2</sup>. The charge-discharge recyclability performance was recorded at a constant current density of 10 mA cm<sup>-2</sup> and 20 min for a cycle. For photothermal-assisted ZAB, prior to the battery testing, the ZAB was illuminated for 3 min to reach temperature equilibrium, followed by recording the performance of the battery.

All the ZABs were investigated under ambient atmosphere. The polarization curve measurements were performed by LSV (5 mV s<sup>-1</sup>) at 25 °C with CHI760e electrochemical working station (CH Instrument). Both the current density and power density were normalized to the effective surface area of air electrode. The specific capacity was calculated according the equations below:

$$\frac{\text{current} * \text{service hours}}{\text{weight of consumed zinc}}$$

The energy density was calculated according the equation below:

$$\frac{\text{current} * \text{service hours} * \text{average discharge voltage}}{\text{weight of consumed zinc}}$$

## **2. Supplementary Figures and Tables**

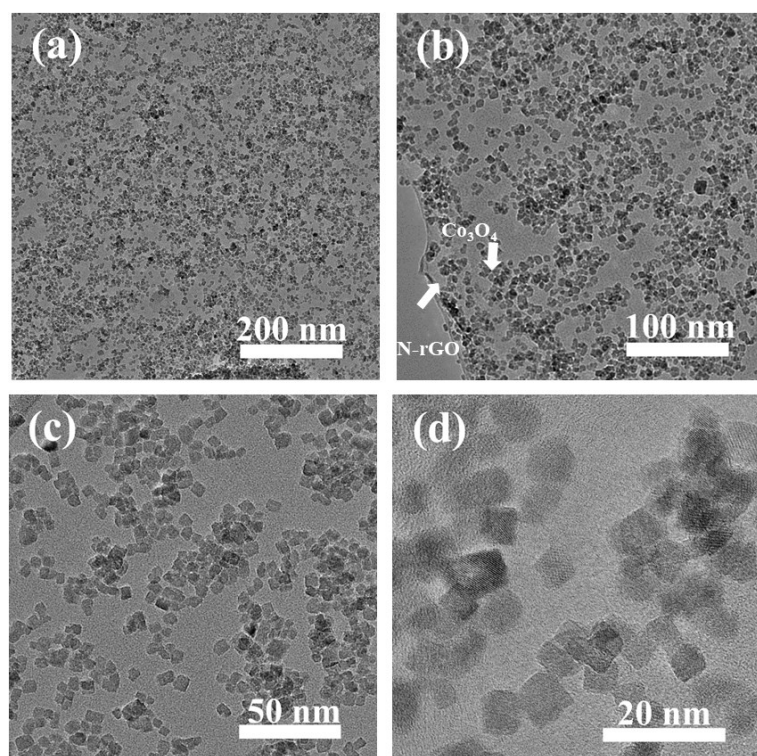

**Supplementary Fig. 1** TEM images of Co<sub>3</sub>O<sub>4</sub>/N-rGO with different magnifications.

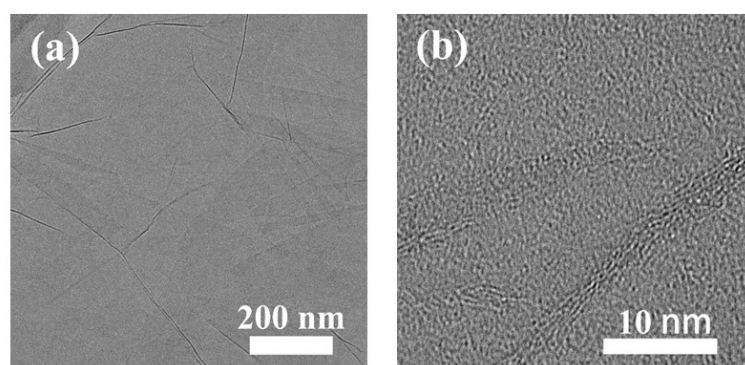

**Supplementary Fig. 2** TEM images of GO with (a) low and (b) high magnifications.

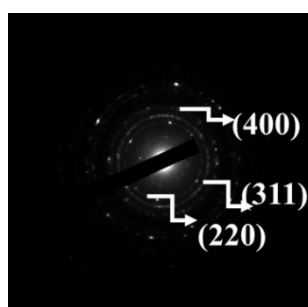

Supplementary Fig. 3 SAED patterns of  $\text{Co}_3\text{O}_4/\text{N-rGO}$

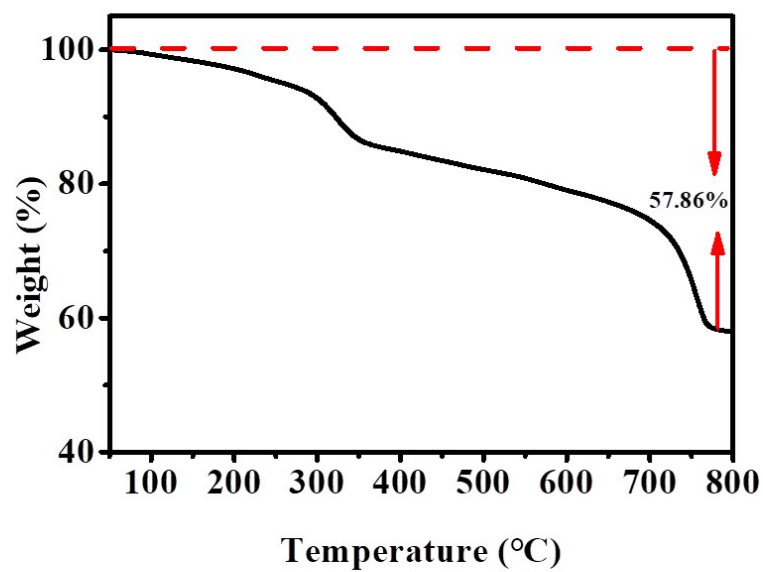

Supplementary Fig. 4 TGA curve of as-prepared  $\text{Co}_3\text{O}_4/\text{N-rGO}$ .

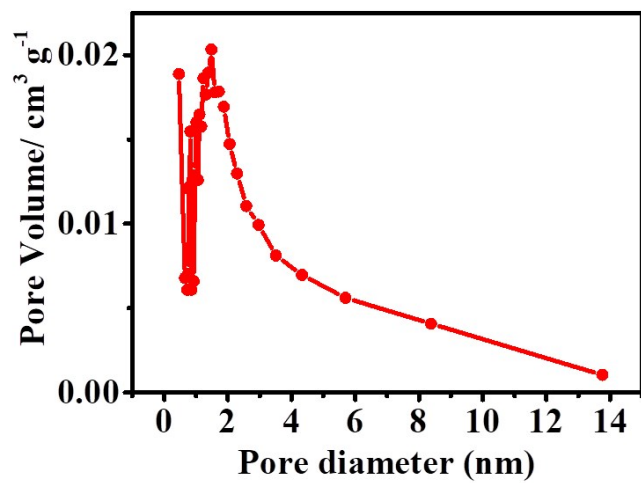

Supplementary Fig. 5 Pore size distribution of  $\text{Co}_3\text{O}_4/\text{N-rGO}$ .

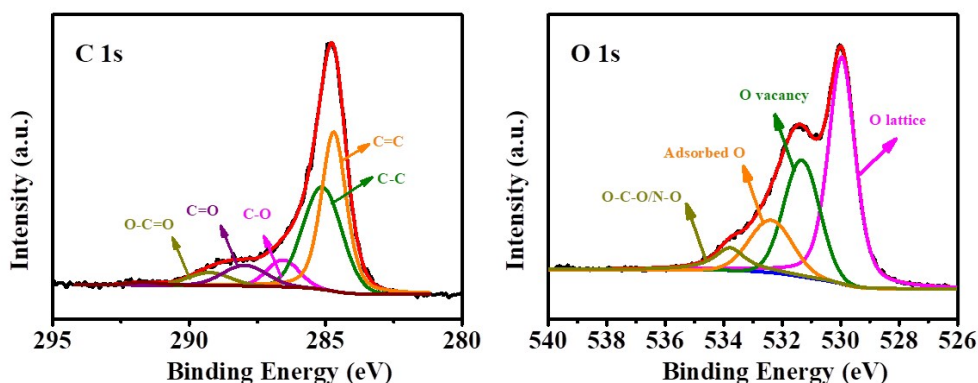

**Supplementary Fig. 6** XPS spectra (C 1s and O 1s) of the as-synthesized  $\text{Co}_3\text{O}_4/\text{N-rGO}$ .

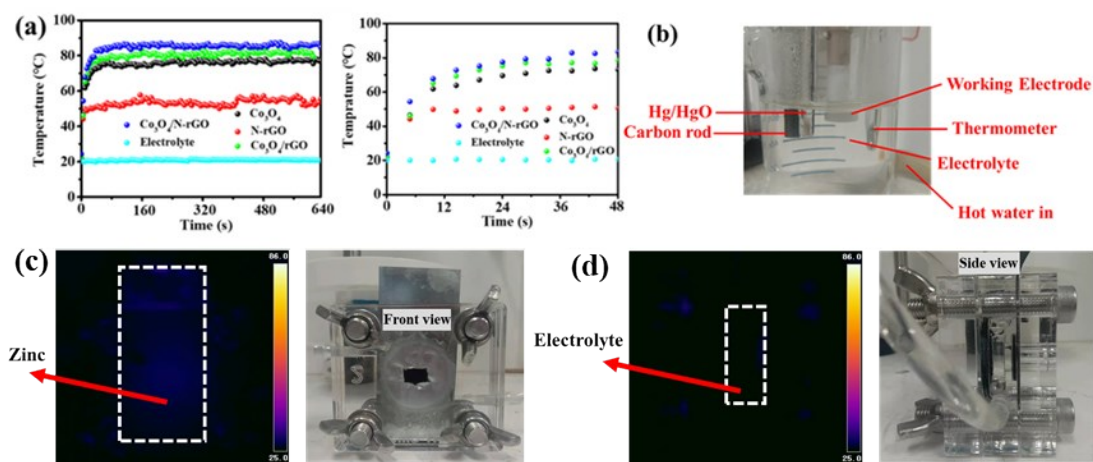

**Supplementary Fig. 7** (a) Temperature variation over time (left) and enlarged range (right) of varied materials and electrolyte solution under 808 nm NIR irradiation. (b) Control experiment using circulating hot water rather than NIR light as the heating source. The obtained temperature was 65 °C for the whole setup including electrolyte, which underwent obvious evaporation during the heating and thus adversely influenced the performance of electrocatalysis and subsequent ZABs. Infrared images and corresponding digital images of (c) front and (d) side views during operation of ZAB at the presence of NIR light illumination. The increase of the test ambient temperature (i.e., heating the whole device) will not only lead to the increased temperature of air cathode (which is conducive to ZAB performance), but also result in adverse side-effects (e.g., leakage and evaporation of electrolyte, which restrict the improvement of ZAB performance) theoretically. In sharp contrast, our strategy enabled the localized heating of air cathode assisted by the photothermal effect, which did not affect the temperature of electrolyte or zinc anode and thus avoided the potential side-effects.

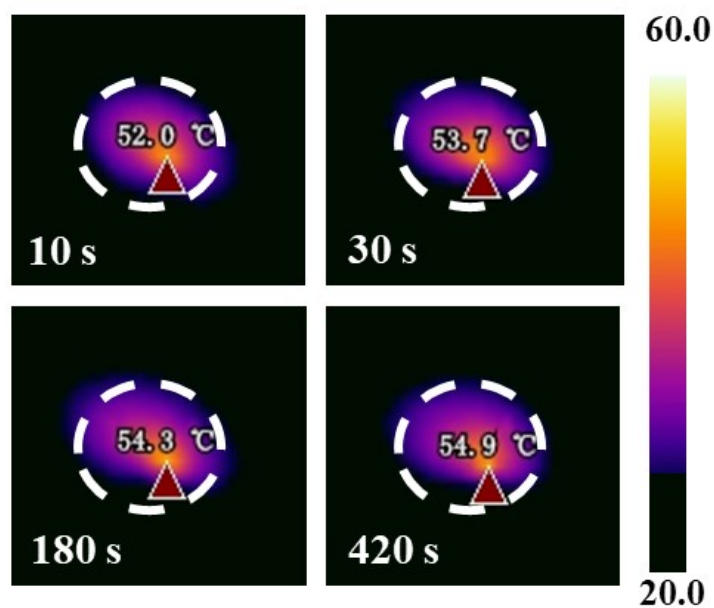

**Supplementary Fig. 8** The temperature change over time (10 s, 30 s, 180 s, and 420 s) of  $\text{Co}_3\text{O}_4$  electrode in 1M KOH electrolyte under 808 nm laser irradiation.

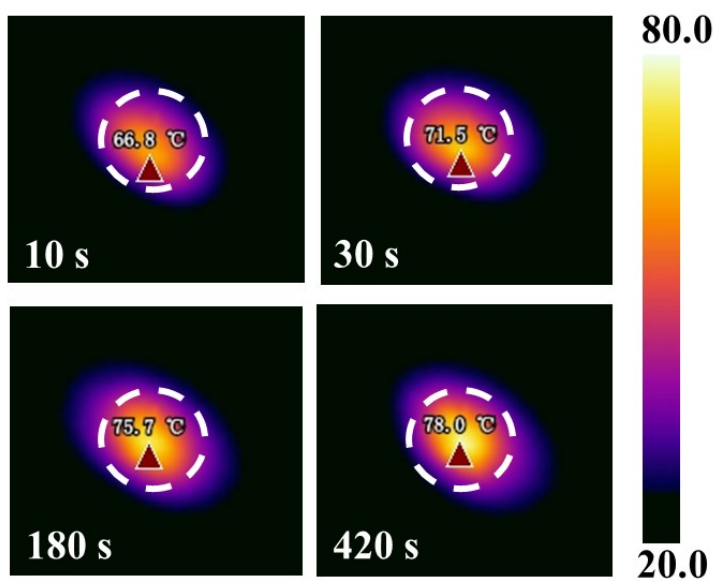

**Supplementary Fig. 9** The temperature change over time (10 s, 30 s, 180 s, and 420 s) of N-rGO electrode in 1M KOH electrolyte under 808 nm laser irradiation.



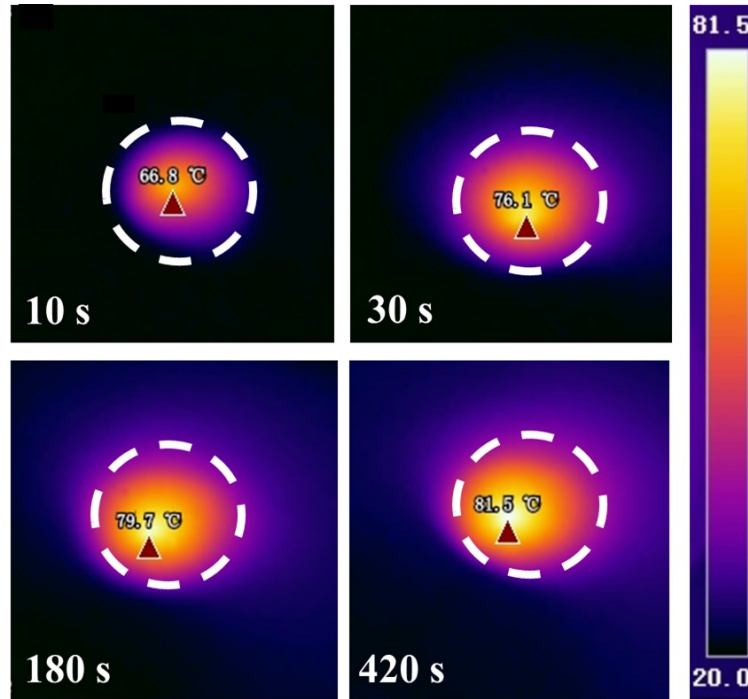

**Supplementary Fig. 10** The temperature change over time (10 s, 30 s, 180 s, and 420 s) of  $\text{Co}_3\text{O}_4/\text{rGO}$  electrode in 1M KOH electrolyte under 808 nm laser irradiation.

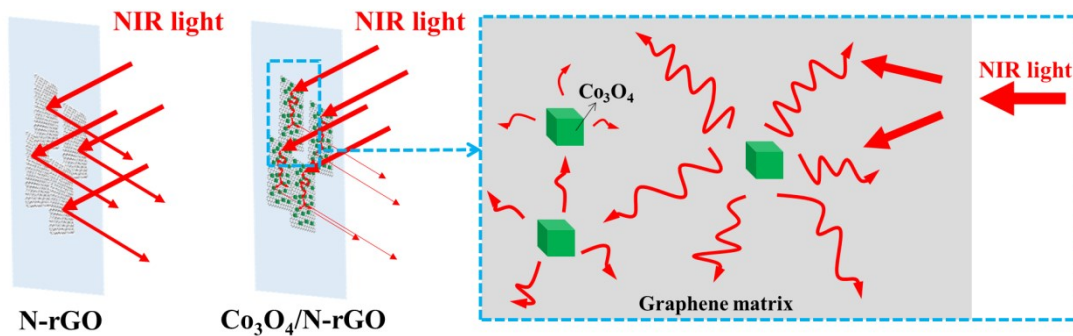

**Supplementary Fig. 11** Schematic of light absorption for N-rGO (left) and  $\text{Co}_3\text{O}_4/\text{N-rGO}$  (right).

As the final temperature of  $\text{Co}_3\text{O}_4$  ( $54.9^\circ\text{C}$ ) was lower than that of N-rGO ( $78^\circ\text{C}$ ) under NIR light irradiation, it is easy to understand that the modification of  $\text{Co}_3\text{O}_4$  with N-rGO (i.e.,  $\text{Co}_3\text{O}_4/\text{N-rGO}$ ) lead to a higher final temperature compared with pure  $\text{Co}_3\text{O}_4$  due to the improved photothermal characteristic of materials. On the other hand, more light was scattered by the  $\text{Co}_3\text{O}_4$  nanoparticles within the composite material ( $\text{Co}_3\text{O}_4/\text{N-rGO}$ ) and the scattered light was absorbed by the graphene matrix (**Fig. S11**), leading to a significantly improved photo-to-thermal conversion compared with pure graphene. Similar observation was obtained in other work<sup>3</sup>. Therefore, the combination of graphene and  $\text{Co}_3\text{O}_4$  as well as their synergy as an efficient light trapping medium resulted in the higher final temperature than that of single material (i.e.,  $\text{Co}_3\text{O}_4$  or N-rGO).

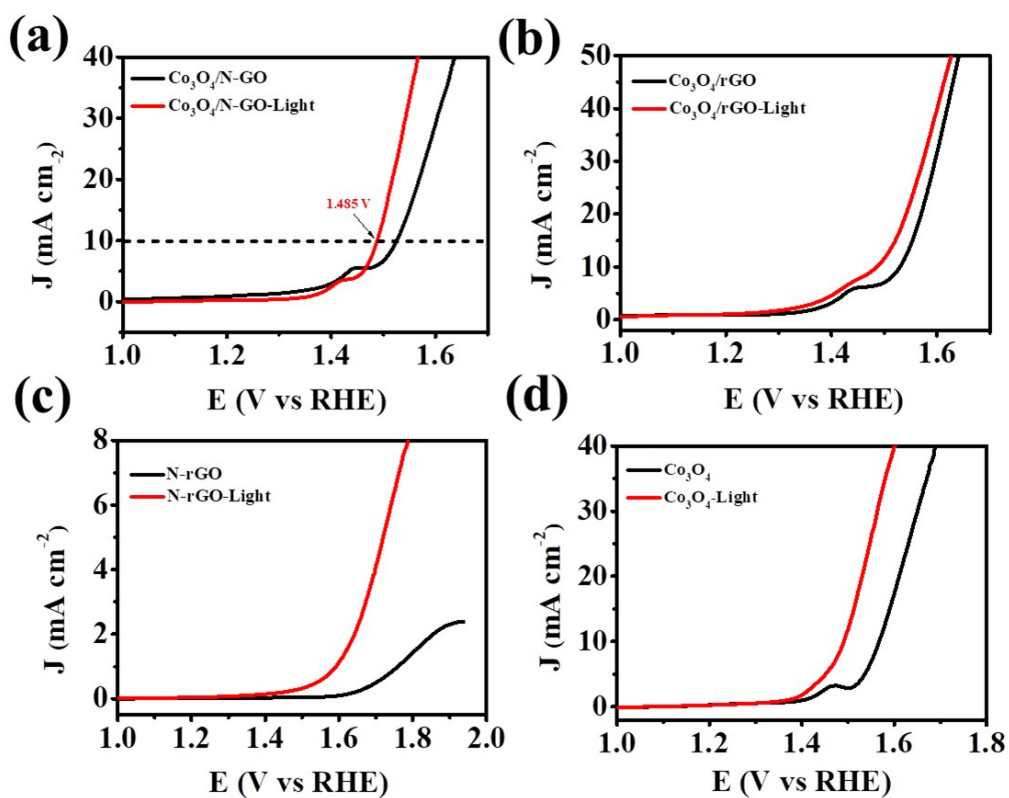

**Supplementary Fig. 12** LSV polarization curves of (a)  $\text{Co}_3\text{O}_4/\text{N-rGO}$ , (b)  $\text{Co}_3\text{O}_4/\text{rGO}$ , (c)  $\text{N-rGO}$ , and (d)  $\text{Co}_3\text{O}_4$  electrodes with or without light.

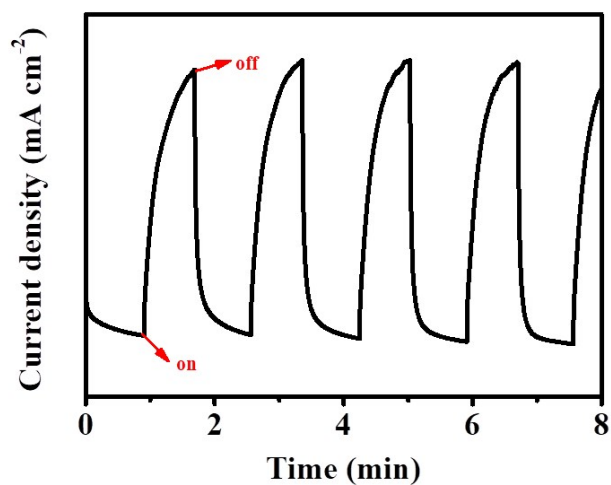

**Supplementary Fig. 13** Current density over time of  $\text{Co}_3\text{O}_4/\text{N-rGO}$  electrode at a potential of 1.524 V<sub>RHE</sub> under intermittent illumination.

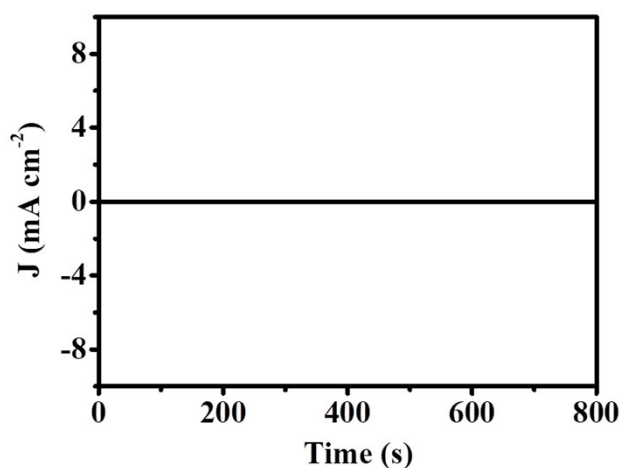

**Supplementary Fig. 14** Photocurrent density for the  $\text{Co}_3\text{O}_4/\text{N-rGO}$  electrode with light.

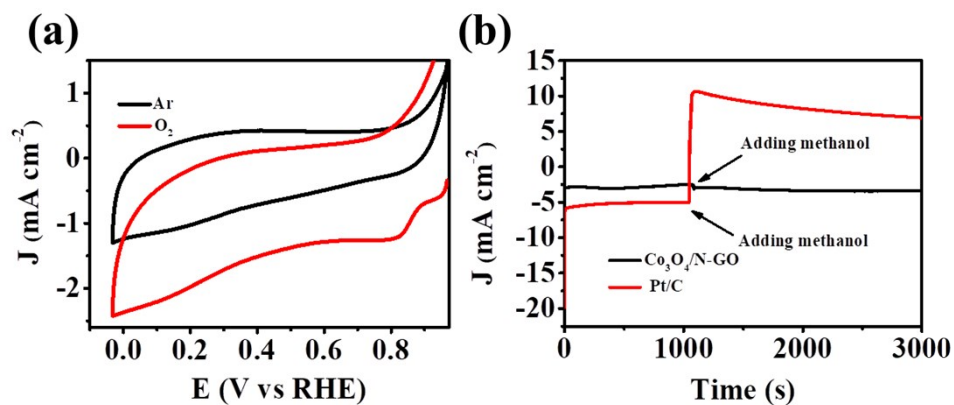

**Supplementary Fig. 15** (a) CV of  $\text{Co}_3\text{O}_4/\text{N-rGO}$  in  $\text{O}_2/\text{Ar}$ -saturated solutions, all dates are measured at a scan rate of 5 mV/s. (b) Methanol resistance test of  $\text{Co}_3\text{O}_4/\text{N-rGO}$  and Pt/C.

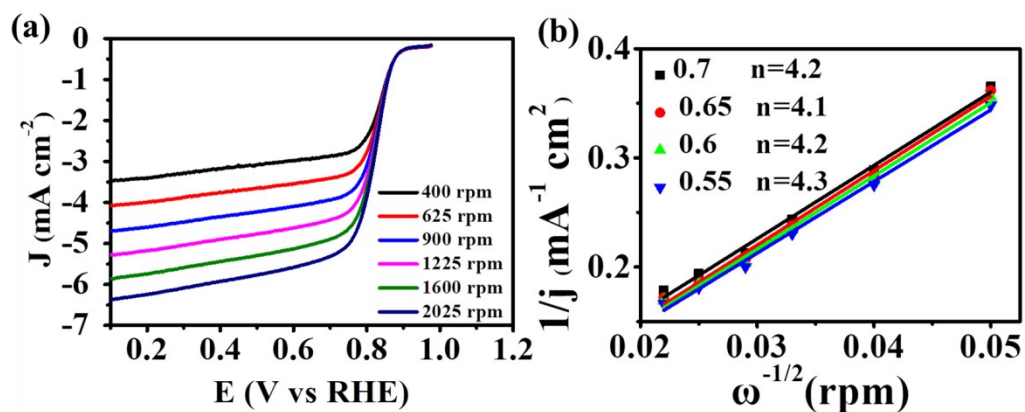

**Supplementary Fig. 16** (a) ORR polarization curves of  $\text{Co}_3\text{O}_4/\text{N-rGO}$  at different rotating speeds. (b) The corresponding Koutecky-Levich plots at different potentials.

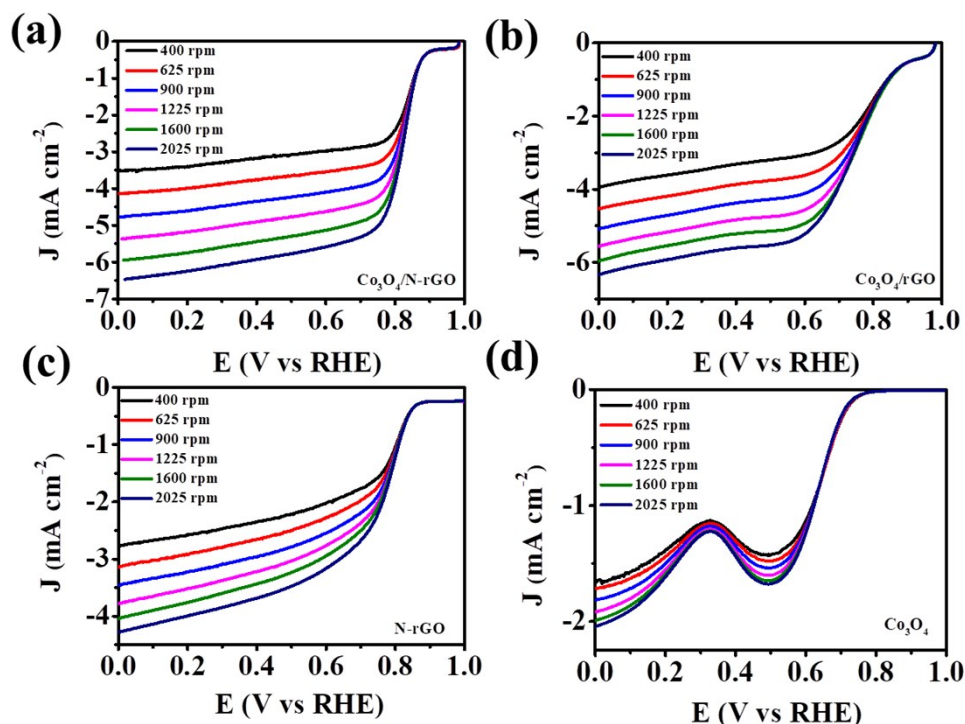

**Supplementary Fig. 17** LSV curves of catalysts at different rotating speeds under  $O_2$ -saturated condition: (a)  $Co_3O_4/N-rGO$  (b)  $Co_3O_4/rGO$ , (c)  $N-rGO$ , and (d)  $Co_3O_4$ .

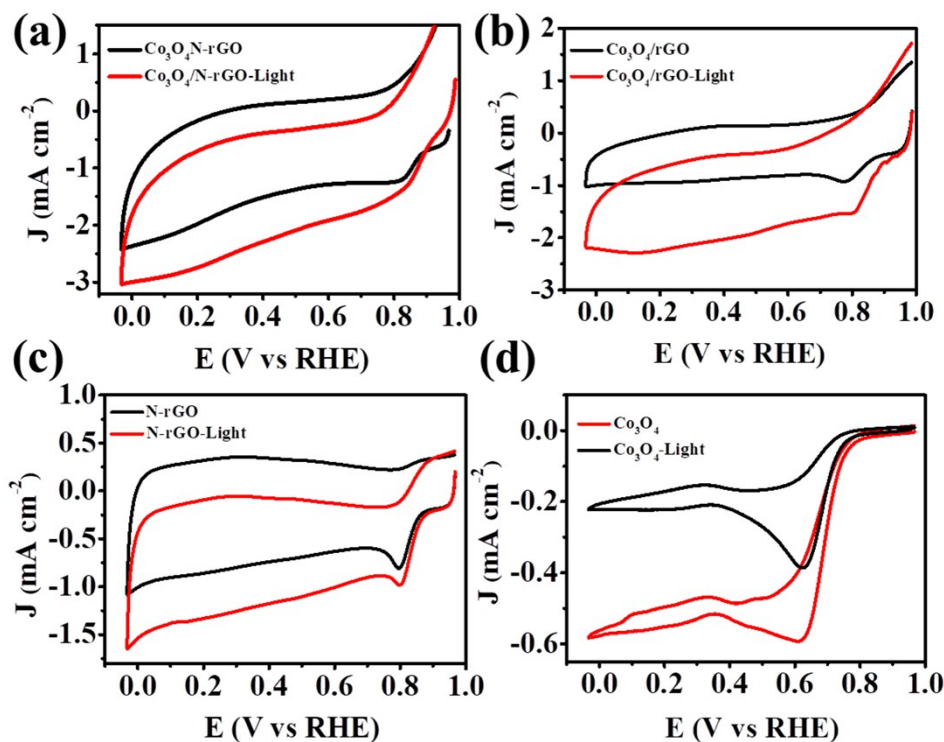

**Supplementary Fig. 18** CV curves of catalysts in 0.1 M KOH  $O_2$ -saturated solution, all dates are measured at a scan rate of 5 mV/s: (a)  $Co_3O_4/N-rGO$  (b)  $Co_3O_4/rGO$ , (c)  $N-rGO$ , and (d)  $Co_3O_4$  electrodes with or without light.

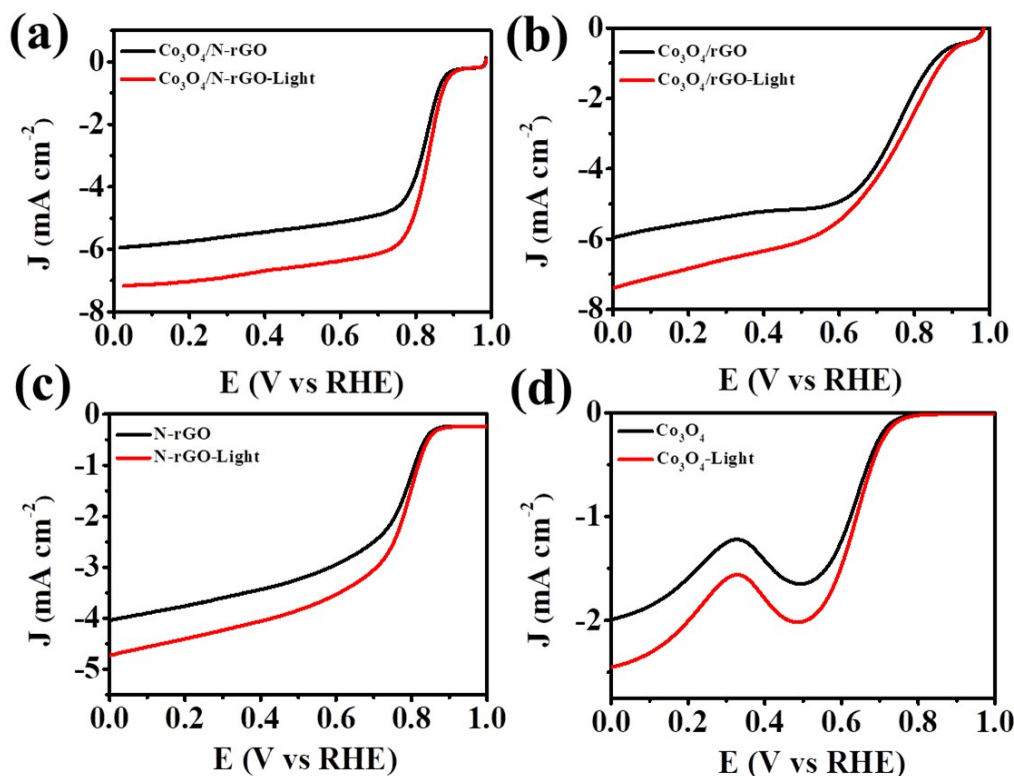

Supplementary Fig. 19 LSV polarization curves in ORR of (a) Co<sub>3</sub>O<sub>4</sub>/N-rGO, (b) Co<sub>3</sub>O<sub>4</sub>/rGO, (c) N-rGO, and (d) Co<sub>3</sub>O<sub>4</sub> electrodes with or without light.

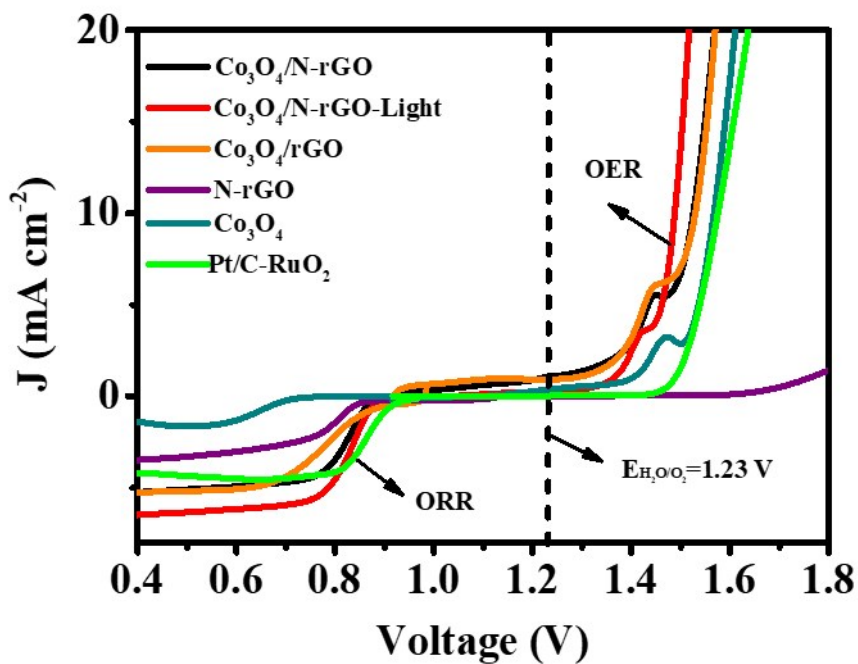

Supplementary Fig. 20 Bifunctional catalytic curves of Co<sub>3</sub>O<sub>4</sub>/N-rGO, Co<sub>3</sub>O<sub>4</sub>/rGO, Co<sub>3</sub>O<sub>4</sub>, N-rGO, RuO<sub>2</sub> and Pt/C.

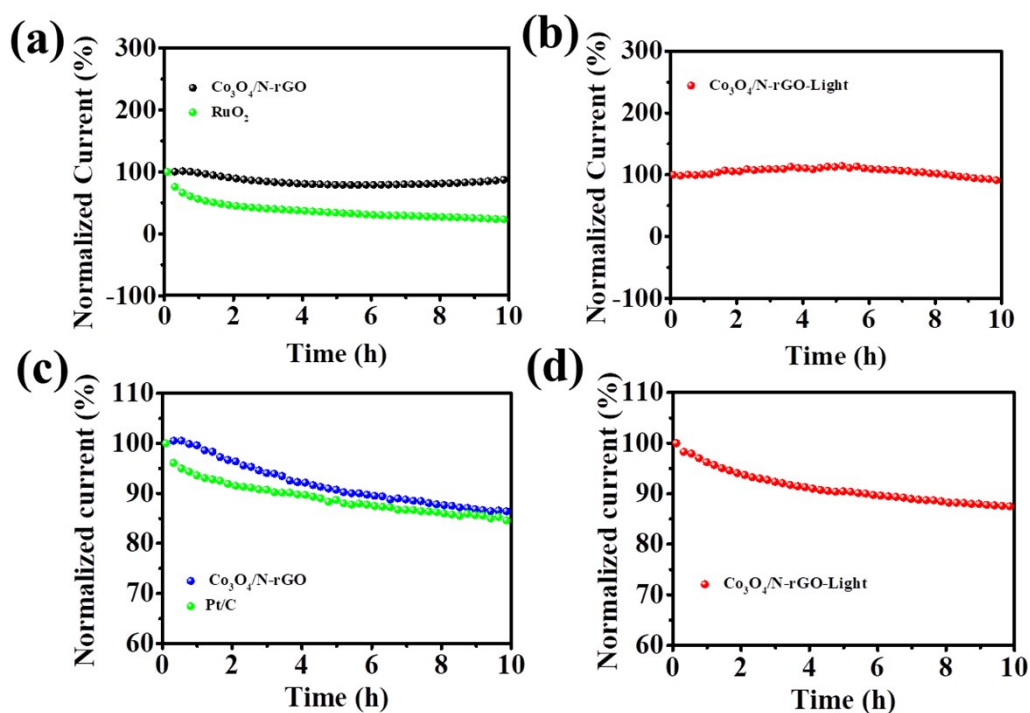

**Supplementary Fig. 21** Stability test of catalysts in OER at a fixed current density of  $10 \text{ mA cm}^{-2}$  over 10 h: (a)  $\text{Co}_3\text{O}_4/\text{N-rGO}$  and commercial  $\text{RuO}_2$  without light in 1 M KOH; (b)  $\text{Co}_3\text{O}_4/\text{N-rGO}$  with light in 1 M KOH. Stability test of catalysts in ORR at a fixed potential of  $0.65 \text{ V}_{\text{RHE}}$  over 10 h: (c)  $\text{Co}_3\text{O}_4/\text{N-rGO}$  and commercial  $\text{Pt/C}$  without light in 0.1 M KOH, (d)  $\text{Co}_3\text{O}_4/\text{N-rGO}$  with light in 0.1 M KOH.

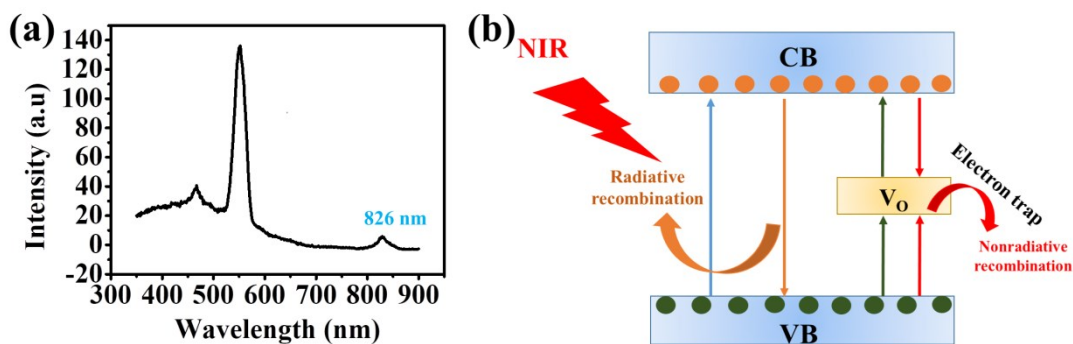

**Supplementary Fig. 22** (a) Photoluminescence spectra of the  $\text{Co}_3\text{O}_4/\text{N-rGO}$ . (b) Schematic presentation for the photothermal effect of  $\text{Co}_3\text{O}_4$ .

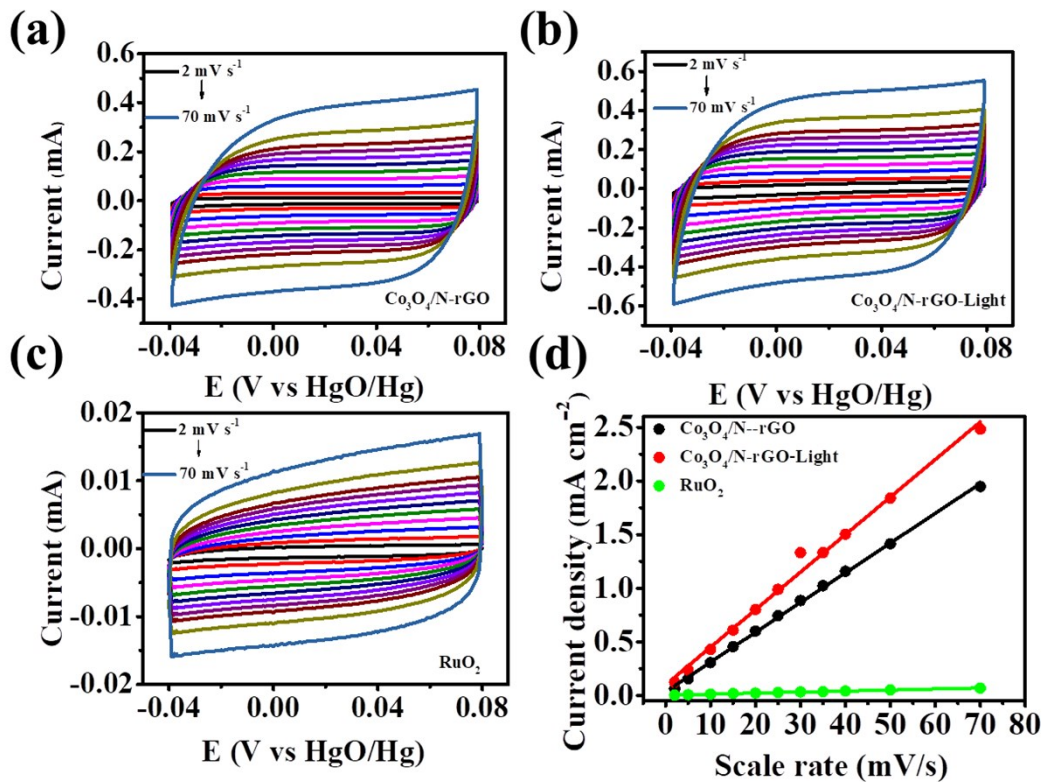

**Supplementary Fig. 23** CV curves of electrodes with different scanning rate: (a)  $\text{Co}_3\text{O}_4/\text{N-rGO}$  without light, (b)  $\text{Co}_3\text{O}_4/\text{N-rGO}$  with light, (c)  $\text{RuO}_2$  without light. (d) Corresponding double-layer capacitance ( $C_d$ ) data derived from CV measurements at different scan rate.

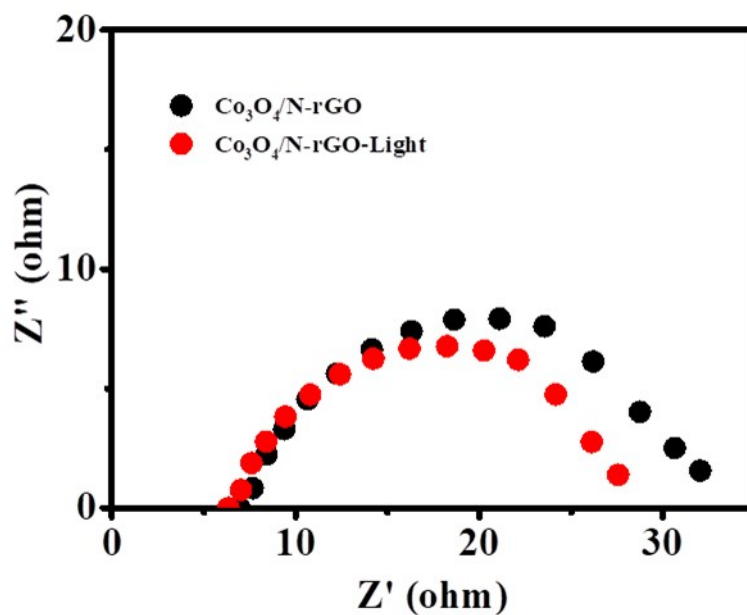

**Supplementary Fig. 24** EIS response of  $\text{Co}_3\text{O}_4/\text{N-rGO}$  electrode in the absence and presence of NIR laser irradiation.

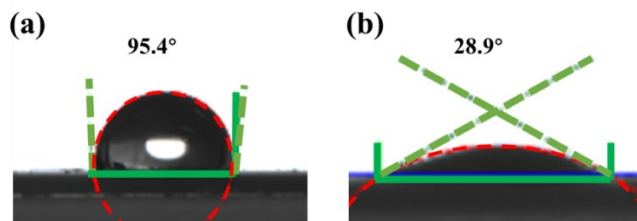

**Supplementary Fig. 25** Contact angle images of the 1 M KOH on the  $\text{Co}_3\text{O}_4/\text{N-rGO}$  electrode surface (a) without and (b) with NIR light irradiation.

It is noteworthy that the fast release of as-formed  $\text{O}_2$  bubbles is an crucial factor in OER process, since the adsorbed bubbles on the electrode surface not only cover the active sites of  $\text{Co}_3\text{O}_4/\text{N-rGO}$ , but also deliver a higher pressure in the electrolyte.<sup>4</sup> As shown in **Fig. S25**, The contact angle of the  $\text{Co}_3\text{O}_4/\text{N-rGO}$ -Light electrode ( $28.9^\circ$ ) is much smaller than that of the  $\text{Co}_3\text{O}_4/\text{N-rGO}$  electrode ( $95.4^\circ$ ), revealing that the photothermal effect can significantly improve the wetting ability of the electrode and in turn reduces the bubble adhesion as well as the size at which bubbles release from the surface.<sup>5</sup> The promotion of wetting ability of the electrode via photothermal effect can be rationalized as follows. The photothermal effect triggers the temperature rise of electrolyte near the surface of electrode due to the heat transfer (**Fig. 3c**). When the temperature increases, the interaction between water molecules weakens, leading to a decrease in the surface tension of water<sup>6</sup>. The value of the contact angle can reflect the wetting ability of the liquid to the solid. The reduced surface tension of water decreases the corresponding contact angle  $\theta$  based on the Young and Young-Laplace equations<sup>7-9</sup>. To this end, a classical semi-empirical equation considering the Gibbs adsorption isotherm and thermodynamics was proposed to estimate the relationship between contact angle and temperature<sup>10,11</sup>:

$$\cos \theta = 1 + C(T_{C0} - T)^{a/(b-a)}$$

where  $T$  and  $T_{C0}$  represent the temperature and critical temperature (i.e. the temperature at which the contact angle drops to 0),  $C$  is a constant, and  $a$  and  $b$  are temperature-invariant constants derived from molecular theory. This semi-empirical equation predicts that the contact angle reduces as the temperature increases<sup>12</sup>. Thus the photothermal effect facilitates to improve the wetting ability of the electrode.

As shown in **Fig. S26**, more  $\text{O}_2$  bubbles with smaller size form on the electrode surface with light illumination at the same current density for OER process, indicating that the greatly boosted release speed of  $\text{O}_2$  bubbles is realized in the presence of the photothermal effect.

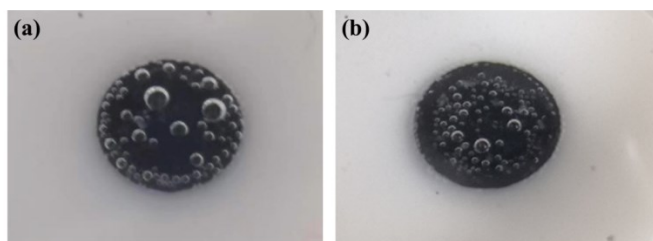

**Supplementary Fig. 26** Digital images of the  $\text{Co}_3\text{O}_4/\text{N-rGO}$  electrode without (a) and with (b) NIR light irradiation at the same current density for OER process. The NIR light was off at the moment taking the photo of (b) for better clarity.



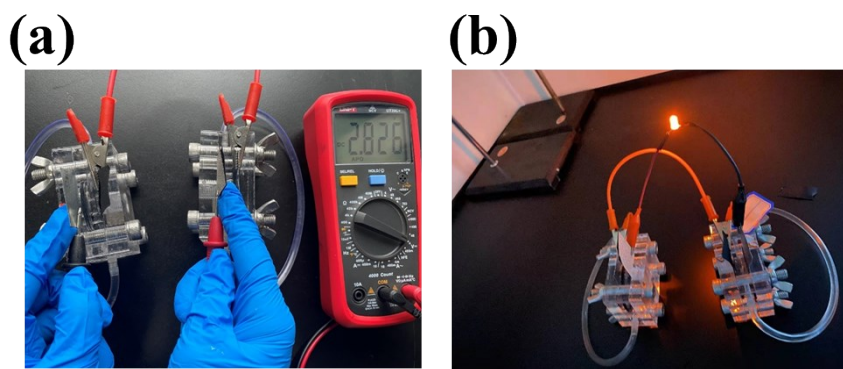

**Supplementary Fig. 27** Digital images of (a) open-circuit voltage of two series-connected  $\text{Co}_3\text{O}_4/\text{N-rGO}$ -based ZABs and the LED driven by the ZABs.

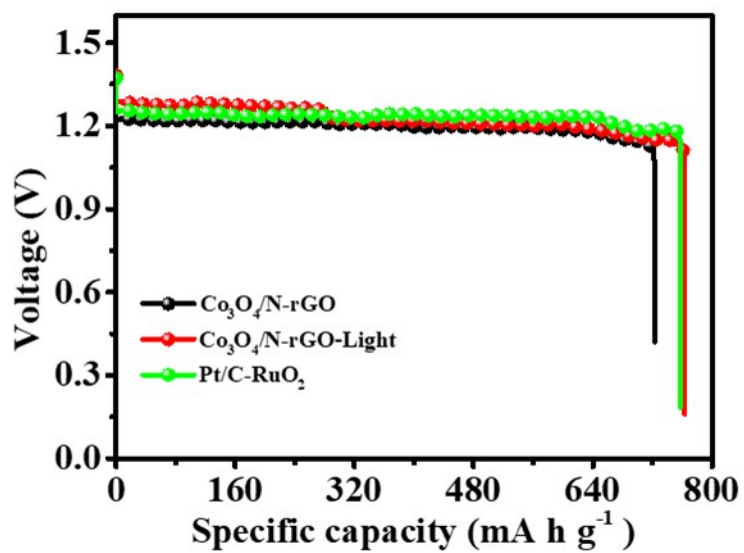

**Supplementary Fig. 28** Specific capacities of ZABs at a current density of  $10 \text{ mA cm}^{-2}$ .

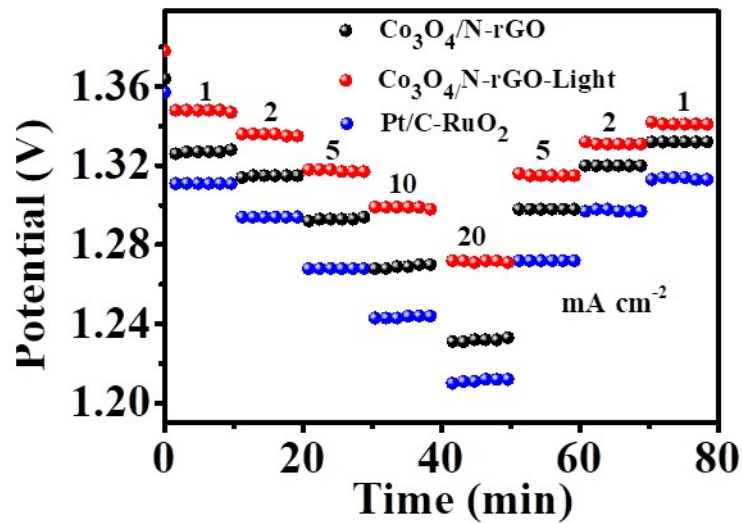

Supplementary Fig. 29 Discharging rate performance of ZABs based on  $\text{Co}_3\text{O}_4/\text{N-rGO}$  with and without light, and  $\text{Pt/C+RuO}_2$ .

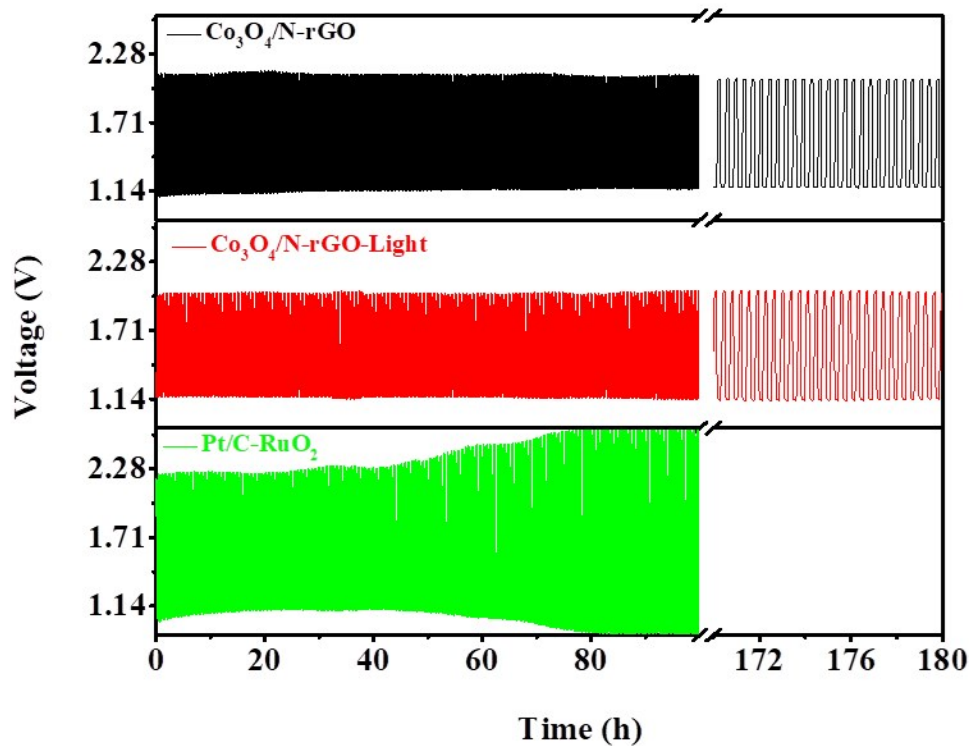

Supplementary Fig. 30 Cycling test of  $\text{Co}_3\text{O}_4/\text{N-rGO}$ -based ZABs with and without light and  $\text{Pt/Ru}$ -based ZAB.

**Supplementary Table 1** Comparison of  $\Delta E$  of the as-synthesized electrocatalysts.

| <b>Catalysts</b>                               | $E_{1/2}$<br>(V <sub>RHE</sub> ) | $E_{j=10}$<br>(V <sub>RHE</sub> ) | $\Delta E$<br>(V) |
|------------------------------------------------|----------------------------------|-----------------------------------|-------------------|
| <b>Co<sub>3</sub>O<sub>4</sub>/N-rGO-Light</b> | 1.485                            | 0.850                             | 0.635             |
| <b>Co<sub>3</sub>O<sub>4</sub>/N-rGO</b>       | 1.529                            | 0.835                             | 0.694             |
| <b>Co<sub>3</sub>O<sub>4</sub>-rGO</b>         | 1.53                             | 0.804                             | 0.726             |
| <b>Co<sub>3</sub>O<sub>4</sub></b>             | 1.567                            | 0.648                             | 0.919             |
| <b>RuO<sub>2</sub>-Pt/C</b>                    | 1.58                             | 0.865                             | 0.715             |
| <b>N-rGO</b>                                   | -                                | 0.814                             | -                 |

**Supplementary Table 2** Comparison of the ORR/OER performance of Co<sub>3</sub>O<sub>4</sub>/N-rGO with those based on Co<sub>3</sub>O<sub>4</sub> electrocatalysts reported in literature.

| Catalysts                                    | OER          |                     | ORR          |                                    |                                  |                                 | $\Delta E$<br>(V) | Ref.      |
|----------------------------------------------|--------------|---------------------|--------------|------------------------------------|----------------------------------|---------------------------------|-------------------|-----------|
|                                              | Electrolytes | $\eta_{10}$<br>(mV) | Electrolytes | $E_{onset}$<br>(V <sub>RHE</sub> ) | $E_{1/2}$<br>(V <sub>RHE</sub> ) | $J_L$<br>(mA cm <sup>-2</sup> ) |                   |           |
| Co <sub>3</sub> O <sub>4</sub> /N-rGO        | 1 M KOH      | 299                 | 0.1 M KOH    | 0.915                              | 0.835                            | -5.8                            | 0.694             | This work |
| Co <sub>3</sub> O <sub>4</sub> /N-rGO-Light  | 1 M KOH      | 255                 |              | 0.934                              | 0.850                            | -7.1                            | 0.636             |           |
| Co <sub>3</sub> O <sub>4</sub>               | 0.1 M KOH    | 380                 |              | 0.74                               | 0.45                             | -2                              | 1.16              | 13        |
| Co <sub>3</sub> O <sub>4</sub>               | 1 M KOH      | 340                 |              | 0.75                               | 0.67                             | -3.5                            | 0.9               | 14        |
| Co <sub>3</sub> O <sub>4</sub> /N-rGO        | 1 M KOH      | 420                 |              | 0.89                               | 0.82                             | -3.5                            | 0.83              | 15        |
| MOF:Co <sub>3</sub> O <sub>4</sub> @C-MWCNTs | 1 M KOH      | 320                 |              | 0.89                               | 0.81                             | -4.5                            | 0.74              | 16        |
| Co/CNT/MCP                                   | 1 M KOH      | 270                 |              | 0.94                               | 0.80                             | -4.8                            | 0.7               | 17        |
| Meso-Co <sub>3</sub> O <sub>4</sub> NPs      | 0.1 M KOH    | 411                 |              | 0.75                               | 0.62                             | -5.5                            | 1.02              | 18        |
| Co <sub>3</sub> O <sub>4</sub> /NHPC         | 0.1 M KOH    | 420                 |              | 0.960                              | 0.835                            | -6.0                            | 0.815             | 19        |
| Co <sub>3</sub> O <sub>4</sub> -NCNT/SS      | 0.1 M KOH    | 440                 |              | 0.95                               | -                                | -                               | -                 | 20        |
| Co <sub>3</sub> O <sub>4</sub> /N-rGO        | 0.1 M KOH    | 490                 |              | 0.90                               | 0.79                             | -5.2                            | 0.93              | 21        |
| PdO-doped Co <sub>3</sub> O <sub>4</sub>     | 1 M KOH      | 350                 |              | -                                  | 0.83                             | -5.1                            | 0.76              | 22        |
| Co <sub>3</sub> O <sub>4</sub> NS/ZTC        | 1 M KOH      | 380                 |              | 0.81                               | 0.7                              | -5.5                            | 0.91              | 23        |
| Co/Co <sub>3</sub> O <sub>4</sub> -NG        | 0.1 M NaOH   | 437                 |              | 0.1 M NaOH                         | 0.870                            | 0.617                           | -4.3              | 1.05      |

**Supplementary Table 3** Comparison of the performance of Co<sub>3</sub>O<sub>4</sub>/N-rGO-based ZAB with those of ZABs using Co-based electrocatalysts reported in literature.

| Catalysts                                            | $E_{1/2}$<br>(V <sub>RHE</sub> ) | $E_{j=10}$<br>(V <sub>RHE</sub> ) | $\Delta E$<br>(V) | Power density<br>(mW cm <sup>-2</sup> ) | Ref.      |
|------------------------------------------------------|----------------------------------|-----------------------------------|-------------------|-----------------------------------------|-----------|
| Co <sub>3</sub> O <sub>4</sub> /N-rGO                | 0.835                            | 1.529                             | 0.694             | 175.97                                  | This work |
| Co <sub>3</sub> O <sub>4</sub> /N-rGO-Light          | 0.850                            | 1.485                             | 0.636             | 299.02                                  | This work |
| Co-N <sub>x</sub> /C NRA                             | 0.870                            | 1.53                              | 0.660             | 193.2                                   | 25        |
| Co/N-codoped                                         | 0.827                            | 1.626                             | 0.799             | 87                                      | 26        |
| CoNMC                                                | 0.81                             | 1.62                              | 0.81              | 69.55                                   | 27        |
| Co-N-PHCNTs                                          | 0.890                            | 1.62                              | 0.730             | 125.4                                   | 28        |
| CoNPC                                                | 0.81                             | 1.63                              | 0.82              | 80                                      | 29        |
| Co-BTC                                               | 0.79                             | 1.63                              | 0.84              | 336                                     | 30        |
| EA-Co                                                | 0.85                             | 1.57                              | 0.72              | 73                                      | 31        |
| Co-N-PCN                                             | 0.82                             | 1.61                              | 0.79              | -                                       | 32        |
| LaCoO <sub>3</sub>                                   | 0.64                             | 1.74                              | 1.10              | -                                       | 33        |
| Co <sub>3</sub> O <sub>4</sub> /oCNT                 | 0.75                             | 1.75                              | 1.00              | -                                       | 34        |
| CoFe/SN/carbon                                       | 0.843                            | 1.504                             | 0.661             | 169                                     | 35        |
| Co <sub>3</sub> FeN                                  | 0.79                             | 1.65                              | 0.86              | 108                                     | 36        |
| CoS-A                                                | 0.75                             | 1.62                              | 0.87              | -                                       | 37        |
| NiCo <sub>2</sub> S <sub>4</sub> HSs                 | 0.8                              | 1.63                              | 0.83              | -                                       | 38        |
| f-CoNC/GO                                            | 0.82                             | 1.58                              | 0.76              | 152                                     | 39        |
| Co-N <sub>2</sub> B-CSs                              | 0.83                             | 1.68                              | 0.83              | 100.4                                   | 40        |
| Co-G@POF                                             | 0.81                             | 1.66                              | 0.85              | 241                                     | 41        |
| Co <sub>3</sub> O <sub>4</sub> /NPGC                 | 0.842                            | 1.68                              | 0.838             | -                                       | 42        |
| Co <sub>3</sub> FeS <sub>1.5</sub> (OH) <sub>6</sub> | 0.721                            | 1.588                             | 0.867             | 113.1                                   | 43        |
| CoN <sub>4</sub> /NG                                 | 0.87                             | 1.61                              | 0.74              | 28                                      | 44        |
| CoPc-GO                                              | 0.76                             | 1.6                               | 0.84              | -                                       | 45        |
| CoS/NSCs                                             | 0.876                            | 1.61                              | 0.734             | -                                       | 46        |
| Co-Ni-S/NSPC                                         | 0.82                             | 1.70                              | 0.88              | 51.6                                    | 47        |
| Co <sub>9</sub> S <sub>8</sub> /C                    | 0.778                            | 1.664                             | 0.886             | -                                       | 48        |
| Co <sub>3</sub> O <sub>4</sub> /NBGHSs               | 0.862                            | 1.70                              | 0.838             | 330                                     | 49        |
| NCNT/Co <sub>x</sub> Mn <sub>1-x</sub> O             | 0.84                             | 1.57                              | 0.73              | -                                       | 50        |
| Ni/NiO/NiCo <sub>2</sub> O <sub>4</sub> /N-CNT       | 0.74                             | 1.51                              | 0.87              | -                                       | 51        |
| Co <sub>3</sub> O <sub>4</sub> /NHPC                 | 0.835                            | 1.65                              | 0.815             | 80                                      | 19        |

|                                                               |       |       |       |        |    |
|---------------------------------------------------------------|-------|-------|-------|--------|----|
| <b>NiCoO<sub>2</sub>/CNTs</b>                                 | 0.67  | 1.66  | 0.99  | -      | 52 |
| <b>NiCoMnO<sub>4</sub>/N-rGO</b>                              | 0.75  | 1.74  | 0.99  | -      | 53 |
| <b>CoS<sub>x</sub>/Co-NC</b>                                  | 0.80  | 1.54  | 0.74  | 103    | 54 |
| <b>Co<sub>3</sub>O<sub>4</sub>/N-rmGO</b>                     | 0.8   | 1.6   | 0.8   | -      | 55 |
| <b>NiCo<sub>2</sub>S<sub>4</sub>/N/S-rGO</b>                  | ~0.79 | 1.72  | 0.93  | -      | 56 |
| <b>Co<sub>9</sub>S<sub>8</sub>/N-C</b>                        | 0.765 | 1.565 | 0.80  | -      | 57 |
| <b>NiCo<sub>2</sub>S<sub>4</sub>/N-CNT</b>                    | 0.80  | 1.60  | 0.80  | 147    | 58 |
| <b>Co<sub>9</sub>S<sub>8</sub>/CNT</b>                        | 0.82  | 1.599 | 0.779 | 200    | 59 |
| <b>Co<sub>9</sub>S<sub>8</sub>/NSPG-900</b>                   | 0.800 | 1.573 | 0.820 | -      | 60 |
| <b>Fe<sub>0.5</sub>Co<sub>0.5</sub>O<sub>x</sub>/NrGO</b>     | 0.747 | 1.487 | 0.740 | 86     | 61 |
| <b>MnO@Co-N/C</b>                                             | 0.83  | 1.76  | 0.93  | 130.3  | 62 |
| <b>NiCo<sub>2</sub>O<sub>4</sub>/Co<sub>3</sub>N-CNTs NCs</b> | 0.862 | 1.569 | 0.707 | 173.7  | 63 |
| <b>Co-POC</b>                                                 | 0.83  | 1.7   | 0.87  | 78.0   | 64 |
| <b>CoNi-SAs/NC</b>                                            | 0.76  | 1.57  | 0.81  | -      | 65 |
| <b>Co-N/HCS</b>                                               | 0.86  | 1.72  | 0.86  | -      | 66 |
| <b>FeCo(a)-ACM</b>                                            | 0.9   | 1.6   | 0.7   | 159.92 | 67 |
| <b>UNT Co SAs/N-C</b>                                         | 0.89  | 1.61  | 0.72  | -      | 68 |
| <b>Co-N-C/rGO</b>                                             | 0.87  | 1.72  | 0.85  | -      | 69 |
| <b>FeCo-NGS</b>                                               | 0.84  | 1.61  | 1.61  | 169.43 | 70 |
| <b>FeCo-N-C</b>                                               | 0.896 | 1.6   | 0.704 | 150    | 71 |
| <b>Co-N-PDEB</b>                                              | 0.84  | 1.92  | 1.08  | -      | 72 |
| <b>NGM-Co</b>                                                 | 0.77  | 1.72  | 0.95  | 152    | 73 |
| <b>MnCo<sub>2</sub>O<sub>4.5</sub></b>                        | 0.7   | 1.7   | 1.0   | -      | 74 |
| <b>LT-Li<sub>0.5</sub>CoO<sub>2</sub></b>                     | 0.64  | 1.57  | 0.93  | -      | 75 |
| <b>CuCo<sub>2</sub>S<sub>4</sub>NSs</b>                       | 0.70  | 1.517 | 0.817 | -      | 76 |
| <b>Co<sub>3</sub>O<sub>4</sub>/Ni foam</b>                    | 0.75  | -     | -     | 35.7   | 77 |
| <b>Co-NiO</b>                                                 | 0.79  | 1.53  | 0.74  | 93     | 78 |
| <b>5%Ni-Co</b>                                                | 0.83  | 1.61  | 0.78  | -      | 79 |
| <b>N - GCNT/FeCo</b>                                          | 0.92  | 1.73  | 0.81  | 89.3   | 80 |
| <b>N-CoS<sub>2</sub>YSSs</b>                                  | 0.81  | 1.60  | 0.79  | 81     | 81 |
| <b>CoMnON/G</b>                                               | 0.807 | 1.7   | 0.893 | -      | 82 |
| <b>Na<sub>2</sub>CoPO<sub>4</sub>F</b>                        | 0.792 | 1.647 | 0.855 | -      | 83 |
| <b>N-NiCo<sub>2</sub>O<sub>4</sub>/C</b>                      | 0.81  | 1.472 | 0.662 | -      | 84 |
| <b>PtCo-3 NC</b>                                              | 0.86  | 1.616 | 0.756 |        | 85 |

|                                                                    |       |       |       |       |     |
|--------------------------------------------------------------------|-------|-------|-------|-------|-----|
| <b>MnFe<sub>2</sub>O<sub>4</sub>/NiCo<sub>2</sub>O<sub>4</sub></b> | 0.767 | 1.574 | 0.807 | -     | 86  |
| <b>Co/CoO@Co-N-C-800</b>                                           | 0.746 | 1.564 | 0.818 | 157   | 87  |
| <b>Co/CoO<sub>x</sub>@Co/N-graphene</b>                            | 0.74  | -     | -     | 39    | 88  |
| <b>Fe<sub>3</sub>C/Co(Fe)O<sub>x</sub>@NCNT</b>                    | 0.86  | 1.58  | 0.72  | 231   | 89  |
| <b>CuCoO<sub>x</sub>/FeOOH</b>                                     | 0.78  | 1.50  | 0.72  | -     | 90  |
| <b>Pd@PdO-Co<sub>3</sub>O<sub>4</sub></b>                          | 0.727 | 1.54  | 0.813 | -     | 91  |
| <b>Pt-LiCoO<sub>2</sub></b>                                        | 0.81  | 1.67  | 0.86  | -     | 92  |
| <b>NiS<sub>2</sub>/CoS<sub>2</sub></b>                             | 0.79  | 1.54  | 0.75  | 101   | 93  |
| <b>In-CoO/CoP FNS</b>                                              | 0.81  | 1.587 | 0.787 | 139.4 | 94  |
| <b>NiO/CoO TINWs</b>                                               | 0.803 | 1.485 | 0.682 | 151   | 95  |
| <b>CoO<sub>x</sub>NPs/BNG</b>                                      | 0.805 | 1.525 | 0.72  | -     | 96  |
| <b>GM-Co-B-N</b>                                                   | 0.80  | 1.60  | 0.80  | -     | 97  |
| <b>Co<sub>3</sub>O<sub>4</sub>/Ag@NrGO</b>                         | 0.751 | 1.667 | 0.916 | 160   | 98  |
| <b>Meso - Co<sub>3</sub>O<sub>4</sub></b>                          | 0.66  | 1.62  | 0.96  | -     | 79  |
| <b>3DCo@N/C</b>                                                    | 0.812 | 1.612 | 0.80  | -     | 99  |
| <b>Co<sub>9</sub>S<sub>8</sub>/N,S-DLCTs</b>                       | 0.890 | 1.597 | 0.707 | -     | 100 |
| <b>S-Co<sub>9-x</sub>Fe<sub>x</sub>S<sub>8</sub>@rGO</b>           | 0.84  | 1.51  | 0.67  | -     | 101 |
| <b>CoS/NSC</b>                                                     | 0.84  | 1.58  | 0.74  | -     | 102 |
| <b>Co<sub>9</sub>S<sub>8</sub>@TDC-900</b>                         | 0.78  | 1.56  | 0.78  | -     | 103 |
| <b>Co<sub>9-x</sub>Ni<sub>x</sub>S<sub>8</sub>/NC</b>              | 0.86  | 1.65  | 0.79  | 75    | 104 |
| <b>Co-Fe-S@NSRPC</b>                                               | 0.80  | 1.60  | 0.80  | 138   | 105 |
| <b>Co,Mg/S<sub>2</sub>@CNTs</b>                                    | 0.79  | 1.59  | 0.80  | 268   | 106 |
| <b>NiCo<sub>2</sub>S<sub>4</sub>/RGO</b>                           | 0.78  | 1.69  | 0.91  | 262.6 | 107 |
| <b>Co<sub>9</sub>S<sub>8</sub>/GN</b>                              | 0.8   | 1.68  | 0.88  | 186   | 108 |
| <b>Co<sub>2</sub>P@CoNPG</b>                                       | 0.81  | 1.728 | 0.92  | -     | 109 |
| <b>Co-N/Co-O/N-C-300</b>                                           | 0.80  | 1.60  | 0.80  | -     | 110 |
| <b>Co<sub>1-x</sub>S/N-S-G</b>                                     | 0.862 | 1.601 | 0.739 | -     | 111 |
| <b>Co<sub>9</sub>S<sub>8</sub>/NSGg-C<sub>3</sub>N<sub>4</sub></b> | 0.87  | 1.65  | 0.78  | -     | 112 |
| <b>CoS<sub>2</sub>(400)/N,S-GO</b>                                 | 0.79  | 1.61  | 0.82  | -     | 113 |
| <b>Co<sub>0.5</sub>Fe<sub>0.5</sub>S@N-MC</b>                      | 0.81  | 1.64  | 0.83  | -     | 114 |
| <b>Co<sub>9</sub>S<sub>8</sub>/N,S-CNS</b>                         | 0.8   | 1.58  | 0.78  | -     | 115 |
| <b>Co<sub>3</sub>O<sub>4</sub>@POF</b>                             | 0.82  | 1.56  | 0.74  | 222.2 | 116 |
| <b>CoNP/NC/NG-700</b>                                              | 0.78  | 1.62  | 0.84  | -     | 117 |
| <b>Co<sub>4</sub>N/CNW/CC</b>                                      | 0.80  | 1.54  | 0.74  | 174   | 118 |

|                                                   |       |       |       |       |     |
|---------------------------------------------------|-------|-------|-------|-------|-----|
| <b>Ni<sub>2.25</sub>Co<sub>0.75</sub>N/NrGO-3</b> | 0.79  | 1.59  | 0.80  |       | 119 |
| <b>Co / Fe<sub>2</sub>Ni<sub>2</sub>N @NCNT</b>   | 0.76  | 1.63  | 0.87  | -     | 120 |
| <b>CuCoP-NC-700</b>                               | 0.872 | 1.567 | 0.695 | 116.5 | 121 |
| <b>CuCo<sub>2</sub>S<sub>4</sub> NSs@N-CNFs</b>   | 0.821 | 1.536 | 0.715 | 232   | 122 |
| <b>FeCo-N/C</b>                                   | 0.84  | 1.61  | 0.77  | -     | 123 |
| <b>Co@N-CNTF</b>                                  | 0.81  | 1.58  | 0.77  | 91    | 124 |



**Supplementary Table 4** Comparison of the performance of Co<sub>3</sub>O<sub>4</sub>/N-rGO-based ZAB with those of ZABs using non-Co-based electrocatalysts reported in literature.

| Catalysts                                          | $E_{1/2}$<br>(V <sub>RHE</sub> ) | $E_{j=10}$<br>(V <sub>RHE</sub> ) | $\Delta E$<br>(V) | Power density<br>(mW cm <sup>-2</sup> ) | Ref.      |
|----------------------------------------------------|----------------------------------|-----------------------------------|-------------------|-----------------------------------------|-----------|
| <b>Co<sub>3</sub>O<sub>4</sub>/N-rGO</b>           | 0.835                            | 1.529                             | 0.694             | 175.97                                  | This work |
| <b>Co<sub>3</sub>O<sub>4</sub>/N-rGO-Light</b>     | 0.850                            | 1.485                             | 0.636             | 299.02                                  | This work |
| <b>CFR0.5</b>                                      | 0.70                             | 1.49                              | 0.79              | -                                       | 125       |
| <b>FeNi/N-LCN</b>                                  | 0.850                            | 1.570                             | 0.72              | 162                                     | 126       |
| <b>NCNT</b>                                        | 0.7                              | 1.62                              | 0.9               | -                                       | 127       |
| <b>N/C-DT</b>                                      | 0.78                             | 1.66                              | 0.88              | -                                       | 128       |
| <b>MnFe<sub>2</sub>O<sub>4</sub></b>               | 0.71                             | 1.82                              | 1.11              | -                                       | 129       |
| <b>CLSR</b>                                        | 0.80                             | 1.72                              | 0.92              | 50                                      | 130       |
| <b>L0.95F</b>                                      | 0.38                             | 1.64                              | 1.06              | -                                       | 131       |
| <b>NPMC</b>                                        | 0.85                             | 1.9                               | -                 | 55                                      | 132       |
| <b>LaCoO<sub>3</sub></b>                           | 0.64                             | 1.74                              | 1.10              | -                                       | 33        |
| <b>NB-CN</b>                                       | 0.835                            | 1.65                              | 0.815             | 320                                     | 133       |
| <b>mesoporous LSCO</b>                             | 0.72                             | 1.83                              | 1.11              | -                                       | 134       |
| <b>NiPc/GO</b>                                     | 0.65                             | 1.55                              | 0.9               | -                                       | 45        |
| <b>LTFO/C</b>                                      | 0.72                             | 1.77                              | 1.05              | -                                       | 135       |
| <b>PBSCF-NF</b>                                    | 0.69                             | 1.53                              | 0.84              | 127                                     | 136       |
| <b><math>\alpha</math>-MnO<sub>x</sub>/TiC NPs</b> | 0.80                             | 1.56                              | 0.76              | 217.1                                   | 137       |
| <b>Ni<sub>3</sub>FeN/NRGO</b>                      | 0.70                             | 1.63                              | 0.93              | -                                       | 138       |
| <b>Fe-N-C/ NiFe-LDH</b>                            | 0.792                            | 1.539                             | 0.747             | -                                       | 139       |
| <b>BM LSC</b>                                      | 0.638                            | 1.761                             | 1.123             | -                                       | 140       |
| <b>NSCG</b>                                        | 0.4                              | 1.67                              | 1.27              | 5.9                                     | 141       |
| <b>FeNC</b>                                        | 0.72                             | 1.55                              | 0.83              | -                                       | 142       |
| <b>CNX</b>                                         | 0.66                             | 1.62                              | 0.96              | -                                       | 143       |
| <b>B,N-carbon</b>                                  | 0.84                             | 1.552                             | 0.712             | 143                                     | 144       |
| <b>Fe-NSDC</b>                                     | 0.84                             | 1.64                              | 0.80              | 225.1                                   | 145       |
| <b>NPC</b>                                         | 0.82                             | 1.62                              | 0.8               | -                                       | 146       |
| <b>CNT/NCNT</b>                                    | 0.71                             | 1.76                              | 1.05              | -                                       | 147       |
| <b>NGM</b>                                         | 0.77                             | 1.67                              | 0.90              | -                                       | 148       |
| <b>MR20</b>                                        | 0.80                             | 1.65                              | 0.85              | -                                       | 149       |
| <b>NDGs</b>                                        | 0.85                             | 1.68                              | 0.83              | 115.2                                   | 150       |
| <b>NCYS</b>                                        | 0.81                             | 1.74                              | 0.93              | -                                       | 151       |

|                                                                                               |       |       |       |       |     |
|-----------------------------------------------------------------------------------------------|-------|-------|-------|-------|-----|
| <b>NSC/IGnP</b>                                                                               | 0.64  | 1.66  | 1.02  | -     | 152 |
| <b>CoS-A</b>                                                                                  | 0.75  | 1.62  | 0.87  | -     | 37  |
| <b>CNTBN<sub>5</sub></b>                                                                      | 0.72  | 1.81  | 1.09  | -     | 153 |
| <b>NCNT/Co<sub>x</sub>Mn<sub>1-x</sub>O</b>                                                   | 0.84  | 1.57  | 0.73  | -     | 50  |
| <b>BNPC</b>                                                                                   | 0.803 | 1.78  | 0.977 | -     | 154 |
| <b>Fe-N<sub>x</sub>-C</b>                                                                     | 0.91  | 1.83  | 0.92  | 96.4  | 155 |
| <b>CMO</b>                                                                                    | 0.74  | 1.69  | 0.95  | -     | 156 |
| <b>LO-NF-NCNTs</b>                                                                            | 0.772 | ~1.71 | 0.938 | -     | 157 |
| <b>NiFe-LDH/NrGO</b>                                                                          | 0.75  | 1.488 | 0.738 | 113.1 | 43  |
| <b>Mn<sub>0.5</sub>(Fe<sub>0.3</sub>Ni<sub>0.7</sub>)<sub>0.5</sub>O<sub>x</sub>/MWCNTs-O</b> | 0.84  | 1.57  | 0.73  | -     | 158 |
| <b>LC<sub>5</sub>N<sub>5</sub></b>                                                            | 0.67  | 1.63  | 0.96  | -     | 159 |
| <b>LSCF-6482</b>                                                                              | 0.82  | 1.65  | 0.83  | -     | 160 |
| <b>N, S-CN</b>                                                                                | 0.79  | 1.67  | 0.88  | -     | 161 |
| <b>N-CCs</b>                                                                                  | 0.78  | 1.69  | 0.91  | -     | 162 |
| <b>NSC-1100</b>                                                                               | 0.812 | 1.68  | 0.868 | -     | 163 |
| <b>NC/GC</b>                                                                                  | 0.93  | 1.57  | 0.64  | -     | 164 |
| <b>Ni<sub>1.9</sub>FeS<sub>1.09</sub>(OH)<sub>4.6</sub></b>                                   | 0.4   | 1.496 | 1.0   | -     | 165 |
| <b>TD-CFs</b>                                                                                 | 0.74  | 1.9   | -     | -     | 166 |
| <b>LaNi<sub>0.8</sub>Fe<sub>0.2</sub>O<sub>3</sub></b>                                        | 0.4   | 1.49  | 1.09  | -     | 167 |
| <b>SSC-HG</b>                                                                                 | 0.79  | 1.63  | 0.84  | -     | 168 |
| <b>NMGF</b>                                                                                   | 0.714 | 1.664 | 0.95  | -     | 169 |
| <b>LSMF</b>                                                                                   | 0.73  | 1.84  | 1.11  | -     | 170 |
| <b>N,P-GCNS</b>                                                                               | 0.86  | 1.57  | 0.71  | -     | 171 |
| <b>NCHCs</b>                                                                                  | 0.8   | 1.72  | 0.92  | -     | 172 |
| <b>hSNCNC</b>                                                                                 | 0.792 | 1.639 | 0.847 | -     | 173 |
| <b>2D-PPCN</b>                                                                                | 0.85  | 1.5   | 0.74  | -     | 174 |
| <b>FeCu-N-HC</b>                                                                              | 0.92  | 1.64  | 0.72  | 209.4 | 35  |
| <b>MnSAC</b>                                                                                  | 0.915 | 1.58  | 0.665 | -     | 175 |
| <b>P,S-CNS</b>                                                                                | 0.87  | 1.56  | 0.69  | 198   | 176 |
| <b>S5.84%-LCO</b>                                                                             | 0.704 | 1.594 | 0.89  | 92    | 177 |
| <b>BFC-FC-0.2</b>                                                                             | 0.90  | 1.60  | 0.70  | 160   | 178 |
| <b>La<sub>0.3</sub>-5582</b>                                                                  | 0.55  | 1.56  | 1.01  | -     | 179 |
| <b>BSCF/NiFe</b>                                                                              | 0.78  | 0.78  | 0.785 | 60    | 180 |
| <b>20@B-MWCNTs</b>                                                                            | 0.56  | 1.91  | 1.35  | -     | 181 |

|                                               |       |       |       |       |      |
|-----------------------------------------------|-------|-------|-------|-------|------|
| <b>HNG-900</b>                                | 0.78  | 1.69  | 0.91  | 68    | 182  |
| <b>Ni<sub>12</sub>P<sub>5</sub>/NCNT</b>      | 0.77  | 1.59  | 0.82  | -     | 183  |
| <b>NiS<sub>x</sub>-FeO<sub>y</sub>/SCFP</b>   | 0.78  | 1.6   | 0.82  | -     | 184  |
| <b>NCNHP-1-500</b>                            | 0.828 | 1.54  | 0.712 | -     | 185  |
| <b>BRCAC8502</b>                              | 0.85  | 1.68  | 0.83  | 53    | 186  |
| <b>NiFeO@MnO<sub>x</sub></b>                  | 0.805 | 1.63  | 0.825 | -     | 187  |
| <b>NCNF</b>                                   | 0.82  | 1.84  | 1.02  | 185   | 188  |
| <b>nNiFe/3D MPC</b>                           | 0.86  | 1.57  | 0.71  | -     | 189  |
| <b>Fe-NC SAC</b>                              | 0.88  | 1.68  | 0.80  | 180   | 190  |
| <b>Ni<sub>66</sub>Fe<sub>34</sub>-NC</b>      | 0.85  | 1.699 | 0.849 | -     | 191  |
| <b>S,S'-CNT</b>                               | 0.79  | 1.58  | 0.79  | -     | 192  |
| <b>Ni<sub>0.8</sub>Fe<sub>0.2</sub>NSs</b>    | 0.65  | 1.46  | 0.81  | -     | 193  |
| <b>HHPC</b>                                   | 0.78  | 1.58  | 0.8   | 260.5 | 194  |
| <b>1-NH2</b>                                  | 0.76  | 1.45  | 0.69  | -     | 195  |
| <b>NCO-10</b>                                 | 0.73  | 1.63  | 0.9   | -     | 196  |
| <b>NHGNs</b>                                  | 0.85  | 1.83  | 0.98  | -     | 197  |
| <b>FNCO</b>                                   | 0.4   | 1.7   |       | 150   | 198  |
| <b>CNT_BMFePc</b>                             | 0.82  | 1.71  | 0.89  | -     | 199  |
| <b>CCO@C</b>                                  | 0.87  | 1.56  | 0.69  | -     | 200  |
| <b>FePc@N,P-DC</b>                            | 0.903 | 1.56  | 0.66  | 120   | 201  |
| <b>SHG</b>                                    | 0.87  | 1.56  | 0.69  | -     | 202  |
| <b>FeN<sub>x</sub>-PNC</b>                    | 0.86  | 1.635 | 0.775 | 118   | 203  |
| <b>PNGF</b>                                   | 0.845 | 1.55  | 0.705 |       | 204  |
| <b>NiS<sub>x</sub>/NMC</b>                    | 0.89  | 1.57  | 0.68  | 186   | 205  |
| <b>DG</b>                                     | 0.76  | 1.57  | 0.81  | -     | 206  |
| <b>S,N-Fe/N/C-CNT</b>                         | 0.85  | 1.6   | 0.75  | -     | 25   |
| <b>LFP-5</b>                                  | 0.66  | 1.69  | 1.03  | -     | 207  |
| <b>Au1Nx</b>                                  | 0.76  | 1.68  | 0.92  | -     | 208  |
| <b>Ni MnO/CNF</b>                             | 0.826 | 1.589 | 0.763 | -     | 209  |
| <b>G/N-MoS<sub>2</sub></b>                    | 0.716 | 1.62  | 0.904 | -     | 210  |
| <b>Ni-N<sub>4</sub>/GHSs/Fe-N<sub>4</sub></b> | 0.83  | 1.62  | 0.79  |       | 211- |
| <b>M-2</b>                                    | 0.887 | 1.584 | 0.697 | 124   | 212  |
| <b>LSM30</b>                                  | 0.757 | 1.83  | 1.073 | 181.4 | 213  |

## References:

- (1) Chen, P.; Xu, K.; Zhou, T.; Tong, Y.; Wu, J.; Cheng, H.; Lu, X.; Ding, H.; Wu, C.; Xie, Y. *Angewandte Chemie - International Edition* **2016**, *55*, 2488.
- (2) Xue, Y.; Liu, J.; Chen, H.; Wang, R.; Li, D.; Qu, J.; Dai, L. *Angewandte Chemie - International Edition* **2012**, *51*, 12124.
- (3) Zhou, L.; Tan, Y.; Ji, D.; Zhu, B.; Zhang, P.; Xu, J.; Gan, Q.; Yu, Z.; Zhu, J. *Science Advances* **2016**, *2*, e1501227.
- (4) Lu, Z.; Zhu, W.; Yu, X.; Zhang, H.; Li, Y.; Sun, X.; Wang, X.; Wang, H.; Wang, J.; Luo, J.; Lei, X.; Jiang, L. *Advanced Materials* **2014**, *26*, 2683.
- (5) He, B.; Jia, S.; Zhao, M.; Wang, Y.; Chen, T.; Zhao, S.; Li, Z.; Lin, Z.; Zhao, Y.; Liu, X. *Advanced Materials* **2021**, *33*, e2004406.
- (6) *Atkins' Physical Chemistry (8th)*, Oxford University Press **2009**.
- (7) *Fundamentals of Interfacial Engineering*, Wiley-VCH **1997**.
- (8) Li, C.; Huang, J.; Li, Z. *Scientific Reports* **2016**, *6*, 26488.
- (9) Bakli, C.; P, D. S.; Chakraborty, S. *Nanoscale* **2017**, *9*, 12509.
- (10) Song, J.-W.; Fan, L.-W. *Advances in Colloid and Interface Science* **2021**, *288*, 102339.
- (11) *Physical Chemistry of Surfaces*, Wiley-VCH **1982**.
- (12) Song, J. W.; Zeng, D. L.; Fan, L. W. *J Colloid Interface Sci* **2020**, *561*, 870.
- (13) Tomon, C.; Krittayavathananon, A.; Sarawutanukul, S.; Duangdangchote, S.; Phattharasupakun, N.; Homlamai, K.; Sawangphruk, M. *Electrochimica Acta* **2021**, *367*, 137490.
- (14) Béjar, J.; Álvarez-Contreras, L.; Ledesma-García, J.; Arjona, N.; Arriaga, L. G. *Journal of Electroanalytical Chemistry* **2019**, *847*, 113190.
- (15) Kumar, K.; Canaff, C.; Rousseau, J.; Arri-Clacens, S.; Napporn, T. W.; Habrioux, A.; Kokoh, K. B. *The Journal of Physical Chemistry C* **2016**, *120*, 7949.
- (16) Li, X.; Fang, Y.; Lin, X.; Tian, M.; An, X.; Fu, Y.; Li, R.; Jin, J.; Ma, J. *Journal of Materials Chemistry A* **2015**, *3*, 17392.
- (17) Zhou, X.; Liu, X.; Zhang, J.; Zhang, C.; Yoo, S. J.; Kim, J.-G.; Chu, X.; Song, C.; Wang, P.; Zhao, Z.; Li, D.; Zhang, W.; Zheng, W. *Carbon* **2020**, *166*, 284.
- (18) Sa, Y. J.; Kwon, K.; Cheon, J. Y.; Kleitz, F.; Joo, S. H. *Journal of Materials Chemistry A* **2013**, *1*, 9992.
- (19) Guan, J.; Zhang, Z.; Ji, J.; Dou, M.; Wang, F. *ACS Applied Materials & Interfaces* **2017**, *9*, 30662.
- (20) Fu, J.; Hassan, F. M.; Li, J.; Lee, D. U.; Ghannoum, A. R.; Lui, G.; Hoque, M. A.; Chen, Z. *Advanced Materials* **2016**, *28*, 6421.
- (21) Li, Y.; Zhong, C.; Liu, J.; Zeng, X.; Qu, S.; Han, X.; Deng, Y.; Hu, W.; Lu, J. *Advanced Materials* **2018**, *30*, 1703657.
- (22) Hu, T.; Wang, Y.; Zhang, L.; Tang, T.; Xiao, H.; Chen, W.; Zhao, M.; Jia, J.; Zhu, H. *Applied Catalysis B: Environmental* **2019**, *243*, 175.
- (23) Bera, R. K.; Park, H.; Ryoo, R. *Journal of Materials Chemistry A* **2019**, *7*, 9988.
- (24) He, B.; Chen, X.; Lu, J.; Yao, S.; Wei, J.; Zhao, Q.; Jing, D.; Huang, X.; Wang, T. *Electroanalysis* **2016**, *28*, 2435.
- (25) Chen, P.; Zhou, T.; Xing, L.; Xu, K.; Tong, Y.; Xie, H.; Zhang, L.; Yan, W.; Chu, W.; Wu, C.; Xie, Y. *Angewandte Chemie - International Edition* **2017**, *56*, 610.
- (26) Wang, T.; He, Y.; Liu, Y.; Guo, F.; Li, X.; Chen, H.; Li, H.; Lin, Z. *Nano Energy* **2021**, *79*,

105487.

- (27) Rong, Z.; Dong, C.; Zhang, S.; Dong, W.; Huang, F. *Nanoscale* **2020**, *12*, 6089.
- (28) Guan, Y.; Li, Y.; Luo, S.; Ren, X.; Deng, L.; Sun, L.; Mi, H.; Zhang, P.; Liu, J. *Applied Catalysis B: Environmental* **2019**, *256*, 117871.
- (29) Sanetuntikul, J.; Hyun, S.; Ganesan, P.; Shanmugam, S. *Journal of Materials Chemistry A* **2018**, *6*, 24078.
- (30) Zhang, X.; Luo, J.; Lin, H.-F.; Tang, P.; Morante, J. R.; Arbiol, J.; Wan, K.; Mao, B.-W.; Liu, L.-M.; Fransaer, J. *Energy Storage Materials* **2019**, *17*, 46.
- (31) Zhao, J.; Qin, R.; Liu, R. *Applied Catalysis B: Environmental* **2019**, *256*, 117778.
- (32) Tang, Y.; Liu, R.; Liu, S.; Zheng, B.; Lu, Y.; Fu, R.; Wu, D.; Zhang, M.; Rong, M. *Carbon* **2019**, *141*, 704.
- (33) Hardin, W. G.; Mefford, J. T.; Slanac, D. A.; Patel, B. B.; Wang, X.; Dai, S.; Zhao, X.; Ruoff, R. S.; Johnston, K. P.; Stevenson, K. J. *Chemistry of Materials* **2014**, *26*, 3368.
- (34) Zhao, S.; Rasimick, B.; Mustain, W.; Xu, H. *Applied Catalysis B: Environmental* **2017**, *203*, 138.
- (35) Sun, H.; Wang, M.; Zhang, S.; Liu, S.; Shen, X.; Qian, T.; Niu, X.; Xiong, J.; Yan, C. *Advanced Functional Materials* **2020**, *31*, 2006533.
- (36) Guo, H.-P.; Gao, X.-W.; Yu, N.-F.; Zheng, Z.; Luo, W.-B.; Wu, C.; Liu, H.-K.; Wang, J.-Z. *Journal of Materials Chemistry A* **2019**, *7*, 26549.
- (37) Liu, B.; Qu, S.; Kou, Y.; Liu, Z.; Chen, X.; Wu, Y.; Han, X.; Deng, Y.; Hu, W.; Zhong, C. *ACS Applied Materials & Interfaces* **2018**, *10*, 30433.
- (38) Feng, X.; Jiao, Q.; Cui, H.; Yin, M.; Li, Q.; Zhao, Y.; Li, H.; Zhou, W.; Feng, C. *ACS Applied Materials & Interfaces* **2018**, *10*, 29521.
- (39) Jia, Y.; Wang, Y.; Zhang, G.; Zhang, C.; Sun, K.; Xiong, X.; Liu, J.; Sun, X. *Journal of Energy Chemistry* **2020**, *49*, 283.
- (40) Guo, Y.; Yuan, P.; Zhang, J.; Hu, Y.; Amiin, I. S.; Wang, X.; Zhou, J.; Xia, H.; Song, Z.; Xu, Q.; Mu, S. *ACS Nano* **2018**, *12*, 1894.
- (41) Huang, J.; Zhao, B.; Liu, T.; Mou, J.; Jiang, Z.; Liu, J.; Li, H.; Liu, M. *Advanced Functional Materials* **2019**, *29*, 1902255.
- (42) Li, G.; Wang, X.; Fu, J.; Li, J.; Park, M. G.; Zhang, Y.; Lui, G.; Chen, Z. *Angewandte Chemie - International Edition* **2016**, *55*, 4977.
- (43) Wang, H. F.; Tang, C.; Wang, B.; Li, B. Q.; Zhang, Q. *Advanced Materials* **2017**, *29*, 1702327.
- (44) Yang, L.; Shi, L.; Wang, D.; Lv, Y.; Cao, D. *Nano Energy* **2018**, *50*, 691.
- (45) Wan, W.; Triana, C. A.; Lan, J.; Li, J.; Allen, C. S.; Zhao, Y.; Iannuzzi, M.; Patzke, G. R. *ACS Nano* **2020**, *14*, 13279.
- (46) Xiao, Z.; Xiao, G.; Shi, M.; Zhu, Y. *ACS Applied Materials & Interfaces* **2018**, *10*, 16436.
- (47) Fang, W.; Hu, H.; Jiang, T.; Li, G.; Wu, M. *Carbon* **2019**, *146*, 476.
- (48) Li, L.; Song, L.; Guo, H.; Xia, W.; Jiang, C.; Gao, B.; Wu, C.; Wang, T.; He, J. *Nanoscale* **2019**, *11*, 901.
- (49) Jiang, Z.; Jiang, Z.-J.; Maiyalagan, T.; Manthiram, A. *Journal of Materials Chemistry A* **2016**, *4*, 5877.
- (50) Liu, X.; Park, M.; Kim, M. G.; Gupta, S.; Wang, X.; Wu, G.; Cho, J. *Nano Energy* **2016**, *20*, 315.

- (51) Ma, N.; Jia, Y.; Yang, X.; She, X.; Zhang, L.; Peng, Z.; Yao, X.; Yang, D. *Journal of Materials Chemistry A* **2016**, *4*, 6376.
- (52) Ma, L.; Zhou, H.; Sun, Y.; Xin, S.; Xiao, C.; Kumatani, A.; Matsue, T.; Zhang, P.; Ding, S.; Li, F. *Electrochimica Acta* **2017**, *252*, 338.
- (53) Pendashteh, A.; Palma, J.; Anderson, M.; Marcilla, R. *Applied Catalysis B: Environmental* **2017**, *201*, 241.
- (54) Lu, Q.; Yu, J.; Zou, X.; Liao, K.; Tan, P.; Zhou, W.; Ni, M.; Shao, Z. *Advanced Functional Materials* **2019**, *29*, 1904481.
- (55) Liang, Y.; Li, Y.; Wang, H.; Zhou, J.; Wang, J.; Regier, T.; Dai, H. *Nature materials* **2011**, *10*, 780.
- (56) Liu, Q.; Jin, J.; Zhang, J. *ACS Applied Materials & Interfaces* **2013**, *5*, 5002.
- (57) Cao, X.; Zheng, X.; Tian, J.; Jin, C.; Ke, K.; Yang, R. *Electrochimica Acta* **2016**, *191*, 776.
- (58) Han, X.; Wu, X.; Zhong, C.; Deng, Y.; Zhao, N.; Hu, W. *Nano Energy* **2017**, *31*, 541.
- (59) Li, H.; Guo, Z.; Wang, X. *Journal of Materials Chemistry A* **2017**, *5*, 21353.
- (60) Ma, X.-X.; Dai, X.-H.; He, X.-Q. *ACS Sustainable Chemistry & Engineering* **2017**, *5*, 9848.
- (61) Wei, L.; Karahan, H. E.; Zhai, S.; Liu, H.; Chen, X.; Zhou, Z.; Lei, Y.; Liu, Z.; Chen, Y. *Advanced Materials* **2017**, *29*, 1701410.
- (62) Chen, Y.-N.; Guo, Y.; Cui, H.; Xie, Z.; Zhang, X.; Wei, J.; Zhou, Z. *Journal of Materials Chemistry A* **2018**, *6*, 9716.
- (63) Li, J.; Lu, S.; Huang, H.; Liu, D.; Zhuang, Z.; Zhong, C. *ACS Sustainable Chemistry & Engineering* **2018**, *6*, 10021.
- (64) Li, B. Q.; Zhao, C. X.; Chen, S.; Liu, J. N.; Chen, X.; Song, L.; Zhang, Q. *Advanced Materials* **2019**, *31*, e1900592.
- (65) Han, X.; Ling, X.; Yu, D.; Xie, D.; Li, L.; Peng, S.; Zhong, C.; Zhao, N.; Deng, Y.; Hu, W. *Advanced Materials* **2019**, *31*, e1905622.
- (66) Cai, S.; Meng, Z.; Tang, H.; Wang, Y.; Tsiakaras, P. *Applied Catalysis B: Environmental* **2017**, *217*, 477.
- (67) Chen, C.; Cheng, D.; Liu, S.; Wang, Z.; Hu, M.; Zhou, K. *Energy Storage Materials* **2020**, *24*, 402.
- (68) Sun, X.; Sun, S.; Gu, S.; Liang, Z.; Zhang, J.; Yang, Y.; Deng, Z.; Wei, P.; Peng, J.; Xu, Y.; Fang, C.; Li, Q.; Han, J.; Jiang, Z.; Huang, Y. *Nano Energy* **2019**, *61*, 245.
- (69) Cai, S.; Wang, R.; Yourey, W. M.; Li, J.; Zhang, H.; Tang, H. *Science Bulletin* **2019**, *64*, 968.
- (70) Chen, C.; Li, Y.; Cheng, D.; He, H.; Zhou, K. *ACS Applied Materials & Interfaces* **2020**, *12*, 40415.
- (71) Duan, X.; Ren, S.; Pan, N.; Zhang, M.; Zheng, H. *Journal of Materials Chemistry A* **2020**, *8*, 9355.
- (72) Kim, K.; Kang, T.; Kim, M.; Kim, J. *Applied Catalysis B: Environmental* **2020**, *275*, 119107.
- (73) Tang, C.; Wang, B.; Wang, H. F.; Zhang, Q. *Advanced Materials* **2017**, *29*, 1703185
- (74) Bai, Z.; Heng, J.; Zhang, Q.; Yang, L.; Chang, F. *Advanced Energy Materials* **2018**, *8*, 1802390.
- (75) Maiyalagan, T.; Jarvis, K. A.; Therese, S.; Ferreira, P. J.; Manthiram, A. *Nature Communications* **2014**, *5*, 3949.
- (76) Li, Y.; Yin, J.; An, L.; Lu, M.; Sun, K.; Zhao, Y. Q.; Cheng, F.; Xi, P. *Nanoscale* **2018**, *10*, 6581.

- (77) Tan, P.; Chen, B.; Xu, H.; Cai, W.; He, W.; Ni, M. *Applied Catalysis B: Environmental* **2019**, *241*, 104.
- (78) Qian, J.; Guo, X.; Wang, T.; Liu, P.; Zhang, H.; Gao, D. *Applied Catalysis B: Environmental* **2019**, *250*, 71.
- (79) Song, W.; Ren, Z.; Chen, S. Y.; Meng, Y.; Biswas, S.; Nandi, P.; Elsen, H. A.; Gao, P. X.; Suib, S. L. *ACS Applied Materials & Interfaces* **2016**, *8*, 20802.
- (80) Su, C.-Y.; Cheng, H.; Li, W.; Liu, Z.-Q.; Li, N.; Hou, Z.; Bai, F.-Q.; Zhang, H.-X.; Ma, T.-Y. *Advanced Energy Materials* **2017**, *7*, 1602420.
- (81) Lu, X. F.; Zhang, S. L.; Shangguan, E.; Zhang, P.; Gao, S.; Lou, X. W. D. *Advanced Science* **2020**, *7*, 2001178.
- (82) Li, Y.; Kuttiyiel, K. A.; Wu, L.; Zhu, Y.; Fujita, E.; Adzic, R. R.; Sasaki, K. *ChemSusChem* **2017**, *10*, 68.
- (83) Sharma, L.; Gond, R.; Senthilkumar, B.; Roy, A.; Barpanda, P. *ACS Catalysis* **2019**, *10*, 43.
- (84) Zhao, C.-X.; Li, B.-Q.; Liu, J.-N.; Huang, J.-Q.; Zhang, Q. *Chinese Chemical Letters* **2019**, *30*, 911.
- (85) Hu, S.; Goenaga, G.; Melton, C.; Zawodzinski, T. A.; Mukherjee, D. *Applied Catalysis B: Environmental* **2016**, *182*, 286.
- (86) Zhang, Y.-Q.; Li, M.; Hua, B.; Wang, Y.; Sun, Y.-F.; Luo, J.-L. *Applied Catalysis B: Environmental* **2018**, *236*, 413.
- (87) Zhang, X.; Liu, R.; Zang, Y.; Liu, G.; Wang, G.; Zhang, Y.; Zhang, H.; Zhao, H. *Chemical Communications* **2016**, *52*, 5946.
- (88) Niu, Y.; Huang, X.; Wu, X.; Zhao, L.; Hu, W.; Ming Li, C. *Nanoscale* **2017**, *9*, 10233.
- (89) Wang, M.; Qian, T.; Liu, S.; Zhou, J.; Yan, C. *ACS Applied Materials & Interfaces* **2017**, *9*, 21216.
- (90) Kuang, M.; Wang, Q.; Ge, H.; Han, P.; Gu, Z.; Al-Enizi, A. M.; Zheng, G. *ACS Energy Letters* **2017**, *2*, 2498.
- (91) Li, H.-C.; Zhang, Y.-J.; Hu, X.; Liu, W.-J.; Chen, J.-J.; Yu, H.-Q. *Advanced Energy Materials* **2018**, *8*, 1702734.
- (92) Su, C.; Yang, T.; Zhou, W.; Wang, W.; Xu, X.; Shao, Z. *Journal of Materials Chemistry A* **2016**, *4*, 4516.
- (93) Cao, Y.; Zheng, X.; Zhang, H.; Zhang, J.; Han, X.; Zhong, C.; Hu, W.; Deng, Y. *Journal of Power Sources* **2019**, *437*, 226893.
- (94) Jin, W.; Chen, J.; Liu, B.; Hu, J.; Wu, Z.; Cai, W.; Fu, G. *Small* **2019**, *15*, e1904210.
- (95) An, L.; Huang, B.; Zhang, Y.; Wang, R.; Zhang, N.; Dai, T.; Xi, P.; Yan, C. H. *Angewandte Chemie - International Edition* **2019**, *58*, 9459.
- (96) Tong, Y.; Chen, P.; Zhou, T.; Xu, K.; Chu, W.; Wu, C.; Xie, Y. *Angewandte Chemie - International Edition* **2017**, *56*, 7121.
- (97) Wang, C.; Zhao, Z.; Li, X.; Yan, R.; Wang, J.; Li, A.; Duan, X.; Wang, J.; Liu, Y.; Wang, J. *ACS Applied Materials & Interfaces* **2017**, *9*, 41273.
- (98) Wang, Q.; Miao, H.; Sun, S.; Xue, Y.; Liu, Z. *Chemistry – A European Journal* **2018**, *24*, 14816.
- (99) Han, M.; Shi, M.; Wang, J.; Zhang, M.; Yan, C.; Jiang, J.; Guo, S.; Sun, Z.; Guo, Z. *Carbon* **2019**, *153*, 575.
- (100) Hu, C.; Liu, J.; Wang, J.; She, W.; Xiao, J.; Xi, J.; Bai, Z.; Wang, S. *ACS Applied*

*Materials & Interfaces* **2018**, *10*, 33124.

- (101) Liu, T.; Yang, F.; Cheng, G.; Luo, W. *Small* **2018**, *14*, 1703748
- (102) Ren, J.-T.; Yuan, Z.-Y. *ACS Sustainable Chemistry & Engineering* **2019**, *7*, 10121.
- (103) Zhao, J.-Y.; Wang, R.; Wang, S.; Lv, Y.-R.; Xu, H.; Zang, S.-Q. *Journal of Materials Chemistry A* **2019**, *7*, 7389.
- (104) Cai, Z.; Yamada, I.; Yagi, S. *ACS Applied Materials & Interfaces* **2020**, *12*, 5847.
- (105) Fang, W.; Bai, Z.; Yu, X.; Zhang, W.; Wu, M. *Nanoscale* **2020**, *12*, 11746.
- (106) Guo, J.; Xu, N.; Wang, Y.; Wang, X.; Huang, H.; Qiao, J. *ACS Applied Materials & Interfaces* **2020**, *12*, 37164.
- (107) Liang, Y.; Gong, Q.; Sun, X.; Xu, N.; Gong, P.; Qiao, J. *Electrochimica Acta* **2020**, *342*, 136108.
- (108) Sun, X.; Gong, Q.; Liang, Y.; Wu, M.; Xu, N.; Gong, P.; Sun, S.; Qiao, J. *ACS Applied Materials & Interfaces* **2020**, *12*, 38202.
- (109) Xuan, J. *International Journal of Electrochemical Science* **2017**, 10471.
- (110) Lee, K. J.; Shin, D. Y.; Byeon, A.; Lim, A.; Jo, Y. S.; Begley, A.; Lim, D. H.; Sung, Y. E.; Park, H. S.; Chae, K. H.; Nam, S. W.; Lee, K. Y.; Kim, J. Y. *Nanoscale* **2017**, *9*, 15846.
- (111) Qiao, X.; Jin, J.; Fan, H.; Li, Y.; Liao, S. *Journal of Materials Chemistry A* **2017**, *5*, 12354.
- (112) Tang, Y.; Jing, F.; Xu, Z.; Zhang, F.; Mai, Y.; Wu, D. *ACS Applied Materials & Interfaces* **2017**, *9*, 12340.
- (113) Ganesan, P.; Prabu, M.; Sanetuntikul, J.; Shanmugam, S. *ACS Catalysis* **2015**, *5*, 3625.
- (114) Shen, M.; Ruan, C.; Chen, Y.; Jiang, C.; Ai, K.; Lu, L. *ACS Applied Materials & Interfaces* **2015**, *7*, 1207.
- (115) Wu, C.; Zhang, Y.; Dong, D.; Xie, H.; Li, J. *Nanoscale* **2017**, *9*, 12432.
- (116) Liu, J. N.; Li, B. Q.; Zhao, C. X.; Yu, J.; Zhang, Q. *ChemSusChem* **2020**, *13*, 1529.
- (117) Zhong, X.; Jiang, Y.; Chen, X.; Wang, L.; Zhuang, G.; Li, X.; Wang, J.-g. *Journal of Materials Chemistry A* **2016**, *4*, 10575.
- (118) Meng, F.; Zhong, H.; Bao, D.; Yan, J.; Zhang, X. *Journal of the American Chemical Society* **2016**, *138*, 10226.
- (119) Zhao, M.; Peng, H. J.; Zhang, Z. W.; Li, B. Q.; Chen, X.; Xie, J.; Chen, X.; Wei, J. Y.; Zhang, Q.; Huang, J. Q. *Angewandte Chemie - International Edition* **2019**, *58*, 3779.
- (120) Wu, M.; Zhang, G.; Tong, H.; Liu, X.; Du, L.; Chen, N.; Wang, J.; Sun, T.; Regier, T.; Sun, S. *Nano Energy* **2021**, *79*, 105409.
- (121) Zhang, H.; Yang, Z.; Wang, X.; Yan, S.; Zhou, T.; Zhang, C.; Telfer, S. G.; Liu, S. *Nanoscale* **2019**, *11*, 17384.
- (122) Pan, Z.; Chen, H.; Yang, J.; Ma, Y.; Zhang, Q.; Kou, Z.; Ding, X.; Pang, Y.; Zhang, L.; Gu, Q.; Yan, C.; Wang, J. *Advanced Science* **2019**, *6*, 1900628.
- (123) Shui, H.; Jin, T.; Hu, J.; Liu, H. *ChemElectroChem* **2018**, *5*, 1401.
- (124) Guo, H.; Feng, Q.; Zhu, J.; Xu, J.; Li, Q.; Liu, S.; Xu, K.; Zhang, C.; Liu, T. *Journal of Materials Chemistry A* **2019**, *7*, 3664.
- (125) Jin, X.; Agyeman, D. A.; Kim, S.; Kim, Y. H.; Kim, M. G.; Kang, Y.-M.; Hwang, S.-J. *Nano Energy* **2020**, *67*, 104192.
- (126) Li, X.; Liu, Y.; Chen, H.; Yang, M.; Yang, D.; Li, H.; Lin, Z. *Nano Letters* **2021**, *21*, 3098.
- (127) Elumeeva, K.; Masa, J.; Sierau, J.; Tietz, F.; Muhler, M.; Schuhmann, W. *Electrochimica*



*Acta* **2016**, *208*, 25.

(128) Zeng, Z.; Yi, L.; He, J.; Hu, Q.; Liao, Y.; Wang, Y.; Luo, W.; Pan, M. *Journal of Materials Science* **2020**, *55*, 4780.

(129) Si, C.; Zhang, Y.; Zhang, C.; Gao, H.; Ma, W.; Lv, L.; Zhang, Z. *Electrochimica Acta* **2017**, *245*, 829.

(130) Kumar, N.; Kumar, M.; Nagaiah, T. C.; Siruguri, V.; Rayaprol, S.; Yadav, A. K.; Jha, S. N.; Bhattacharyya, D.; Paul, A. K. *ACS Applied Materials & Interfaces* **2020**, *12*, 9190.

(131) Zhu, Y.; Zhou, W.; Yu, J.; Chen, Y.; Liu, M.; Shao, Z. *Chemistry of Materials* **2016**, *28*, 1691.

(132) Zhang, J.; Zhao, Z.; Xia, Z.; Dai, L. *Nature Nanotechnology* **2015**, *10*, 444.

(133) Lu, Z.; Wang, J.; Huang, S.; Hou, Y.; Li, Y.; Zhao, Y.; Mu, S.; Zhang, J.; Zhao, Y. *Nano Energy* **2017**, *42*, 334.

(134) Zhao, Y.; Xu, L.; Mai, L.; Han, C.; An, Q.; Xu, X.; Liu, X.; Zhang, Q. *Proceedings of the National Academy of Sciences* **2012**, *109*, 19569.

(135) Prabu, M.; Ramakrishnan, P.; Ganesan, P.; Manthiram, A.; Shanmugam, S. *Nano Energy* **2015**, *15*, 92.

(136) Bu, Y.; Gwon, O.; Nam, G.; Jang, H.; Kim, S.; Zhong, Q.; Cho, J.; Kim, G. *ACS Nano* **2017**, *11*, 11594.

(137) Song, S.; Li, W.; Deng, Y.-P.; Ruan, Y.; Zhang, Y.; Qin, X.; Chen, Z. *Nano Energy* **2020**, *67*, 104208.

(138) Fan, Y.; Ida, S.; Staykov, A.; Akbay, T.; Hagiwara, H.; Matsuda, J.; Kaneko, K.; Ishihara, T. *Small* **2017**, *13*, 1700099

(139) Dresp, S.; Luo, F.; Schmack, R.; Kühn, S.; Gliech, M.; Strasser, P. *Energy & Environmental Science* **2016**, *9*, 2020.

(140) Oh, M. Y.; Jeon, J. S.; Lee, J. J.; Kim, P.; Nahm, K. S. *RSC Advances* **2015**, *5*, 19190.

(141) Chen, S.; Duan, J.; Zheng, Y.; Chen, X.; Du, X. W.; Jaroniec, M.; Qiao, S.-Z. *Energy Storage Materials* **2015**, *1*, 17.

(142) Mamtani, K.; Jain, D.; Co, A. C.; Ozkan, U. S. *Energy & Fuels* **2017**, *31*, 6541.

(143) Mamtani, K.; Jain, D.; Dogu, D.; Gustin, V.; Gunduz, S.; Co, A. C.; Ozkan, U. S. *Applied Catalysis B: Environmental* **2018**, *220*, 88.

(144) Sun, T.; Wang, J.; Qiu, C.; Ling, X.; Tian, B.; Chen, W.; Su, C. *Advanced Science* **2018**, *5*, 1800036.

(145) Zhang, J.; Zhang, M.; Zeng, Y.; Chen, J.; Qiu, L.; Zhou, H.; Sun, C.; Yu, Y.; Zhu, C.; Zhu, Z. *Small* **2019**, *15*, e1900307.

(146) Ren, J.-T.; Yuan, G.-G.; Weng, C.-C.; Chen, L.; Yuan, Z.-Y. *ChemCatChem* **2018**, *10*, 5297.

(147) Tian, G.-L.; Zhang, Q.; Zhang, B.; Jin, Y.-G.; Huang, J.-Q.; Su, D. S.; Wei, F. *Advanced Functional Materials* **2014**, *24*, 5956.

(148) Tang, C.; Wang, H. F.; Chen, X.; Li, B. Q.; Hou, T. Z.; Zhang, B.; Zhang, Q.; Titirici, M. M.; Wei, F. *Advanced Materials* **2016**, *28*, 6845.

(149) Kang, B.; Jin, X.; Oh, S. M.; Patil, S. B.; Kim, M. G.; Kim, S. H.; Hwang, S.-J. *Applied Catalysis B: Environmental* **2018**, *236*, 107.

(150) Wang, Q.; Ji, Y.; Lei, Y.; Wang, Y.; Wang, Y.; Li, Y.; Wang, S. *ACS Energy Letters* **2018**, *3*, 1183.

- (151) Zhou, J.; Wang, M.; Qian, T.; Liu, S.; Cao, X.; Yang, T.; Yang, R.; Yan, C. *Nanotechnology* **2017**, *28*, 365403.
- (152) Kim, C.; Gwon, O.; Jeon, I.-Y.; Kim, Y.; Shin, J.; Ju, Y.-W.; Baek, J.-B.; Kim, G. *Journal of Materials Chemistry A* **2016**, *4*, 2122.
- (153) Patil, I. M.; Lokanathan, M.; Ganesan, B.; Swami, A.; Kakade, B. *Chemistry* **2017**, *23*, 676.
- (154) Qian, Y.; Hu, Z.; Ge, X.; Yang, S.; Peng, Y.; Kang, Z.; Liu, Z.; Lee, J. Y.; Zhao, D. *Carbon* **2017**, *111*, 641.
- (155) Han, J.; Meng, X.; Lu, L.; Bian, J.; Li, Z.; Sun, C. *Advanced Functional Materials* **2019**, *29*, 1808872.
- (156) Abirami, M.; Hwang, S. M.; Yang, J.; Senthilkumar, S. T.; Kim, J.; Go, W. S.; Senthilkumar, B.; Song, H. K.; Kim, Y. *ACS Applied Materials & Interfaces* **2016**, *8*, 32778.
- (157) Wang, Z.; Zhang, F.; Jin, C.; Luo, Y.; Sui, J.; Gong, H.; Yang, R. *Carbon* **2017**, *115*, 261.
- (158) Morales, D. M.; Kazakova, M. A.; Dieckhöfer, S.; Selyutin, A. G.; Golubtsov, G. V.; Schuhmann, W.; Masa, J. *Advanced Functional Materials* **2019**, *30*, 1905992.
- (159) Wang, H.; Xu, W.; Richins, S.; Liaw, K.; Yan, L.; Zhou, M.; Luo, H. *Electrochimica Acta* **2019**, *296*, 945.
- (160) Elumeeva, K.; Masa, J.; Tietz, F.; Yang, F.; Xia, W.; Muhler, M.; Schuhmann, W. *ChemElectroChem* **2016**, *3*, 138.
- (161) Qu, K.; Zheng, Y.; Dai, S.; Qiao, S. Z. *Nano Energy* **2016**, *19*, 373.
- (162) Huang, J.; Lu, Q.; Ma, X.; Yang, X. *Journal of Materials Chemistry A* **2018**, *6*, 18488.
- (163) Su, Y.; Wang, H.; Zhao, J.; Rummeli, M. H.; Gao, Y.; Jiang, Y.-B.; Zhang, L.; Zou, G. *Electrochimica Acta* **2018**, *280*, 258.
- (164) Wang, Z.; Lu, Y.; Yan, Y.; Larissa, T. Y. P.; Zhang, X.; Wu, D.; Zhang, H.; Yang, Y.; Wang, X. *Nano Energy* **2016**, *30*, 368.
- (165) Wang, B.; Tang, C.; Wang, H. F.; Li, B. Q.; Cui, X.; Zhang, Q. *Small Methods* **2018**, *2*, 1800055.
- (166) Wang, L.; Wang, Y.; Wu, M.; Wei, Z.; Cui, C.; Mao, M.; Zhang, J.; Han, X.; Liu, Q.; Ma, J. *Small* **2018**, *14*, e1800737.
- (167) Zhang, D.; Song, Y.; Du, Z.; Wang, L.; Li, Y.; Goodenough, J. B. *Journal of Materials Chemistry A* **2015**, *3*, 9421.
- (168) Bu, Y.; Nam, G.; Kim, S.; Choi, K.; Zhong, Q.; Lee, J.; Qin, Y.; Cho, J.; Kim, G. *Small* **2018**, *14*, e1802767.
- (169) Wang, H.-F.; Tang, C.; Zhang, Q. *Catalysis Today* **2018**, *301*, 25.
- (170) Yuan, R.-h.; He, Y.; He, W.; Ni, M.; Leung, M. K. H. *Applied Energy* **2019**, *251*, 113406.
- (171) Li, R.; Wei, Z.; Gou, X. *ACS Catalysis* **2015**, *5*, 4133.
- (172) Zheng, X.; Cao, X.; Li, X.; Tian, J.; Jin, C.; Yang, R. *Nanoscale* **2017**, *9*, 1059.
- (173) Fan, H.; Wang, Y.; Gao, F.; Yang, L.; Liu, M.; Du, X.; Wang, P.; Yang, L.; Wu, Q.; Wang, X.; Hu, Z. *Journal of Energy Chemistry* **2019**, *34*, 64.
- (174) Lei, W.; Deng, Y.-P.; Li, G.; Cano, Z. P.; Wang, X.; Luo, D.; Liu, Y.; Wang, D.; Chen, Z. *ACS Catalysis* **2018**, *8*, 2464.
- (175) Shang, H.; Sun, W.; Sui, R.; Pei, J.; Zheng, L.; Dong, J.; Jiang, Z.; Zhou, D.; Zhuang, Z.; Chen, W.; Zhang, J.; Wang, D.; Li, Y. *Nano Letters* **2020**, *20*, 5443.
- (176) Shinde, S. S.; Lee, C. H.; Sami, A.; Kim, D. H.; Lee, S. U.; Lee, J. H. *ACS Nano* **2017**, *11*,

347.

- (177) Ran, J.; Wang, T.; Zhang, J.; Liu, Y.; Xu, C.; Xi, S.; Gao, D. *Chemistry of Materials* **2020**, *32*, 3439.
- (178) Pei, Z.; Yuan, Z.; Wang, C.; Zhao, S.; Fei, J.; Wei, L.; Chen, J.; Wang, C.; Qi, R.; Liu, Z.; Chen, Y. *Angewandte Chemie - International Edition* **2020**, *59*, 4793.
- (179) Jung, J. I.; Jeong, H. Y.; Lee, J. S.; Kim, M. G.; Cho, J. *Angewandte Chemie - International Edition* **2014**, *53*, 4582.
- (180) Majee, R.; Islam, Q. A.; Bhattacharyya, S. *ACS Applied Materials & Interfaces* **2019**, *11*, 35853.
- (181) Cheng, Y.; Tian, Y.; Fan, X.; Liu, J.; Yan, C. *Electrochimica Acta* **2014**, *143*, 291.
- (182) Cui, H.; Jiao, M.; Chen, Y.-N.; Guo, Y.; Yang, L.; Xie, Z.; Zhou, Z.; Guo, S. *Small Methods* **2018**, *2*, 1800144.
- (183) Lv, J.; Abbas, S. C.; Huang, Y.; Liu, Q.; Wu, M.; Wang, Y.; Dai, L. *Nano Energy* **2018**, *43*, 130.
- (184) Cheng, Y.; Li, D.; Shi, L.; Xiang, Z. *Nano Energy* **2018**, *47*, 361.
- (185) Liang, Q.; Chen, Z.; Chen, X.; Li, Y. *Journal of Materials Chemistry A* **2019**, *7*, 20310.
- (186) Li, Q.; He, T.; Zhang, Y.-Q.; Wu, H.; Liu, J.; Qi, Y.; Lei, Y.; Chen, H.; Sun, Z.; Peng, C.; Yi, L.; Zhang, Y. *ACS Sustainable Chemistry & Engineering* **2019**, *7*, 17039.
- (187) Cheng, Y.; Dou, S.; Saunders, M.; Zhang, J.; Pan, J.; Wang, S.; Jiang, S. P. *Journal of Materials Chemistry A* **2016**, *4*, 13881.
- (188) Liu, Q.; Wang, Y.; Dai, L.; Yao, J. *Advanced Materials* **2016**, *28*, 3000.
- (189) Sun, J.; Lowe, S. E.; Zhang, L.; Wang, Y.; Pang, K.; Wang, Y.; Zhong, Y.; Liu, P.; Zhao, K.; Tang, Z.; Zhao, H. *Angewandte Chemie - International Edition* **2018**, *57*, 16511.
- (190) Du, C.; Gao, Y.; Wang, J.; Chen, W. *Journal of Materials Chemistry A* **2020**, *8*, 9981.
- (191) Ma, M.; Kumar, A.; Wang, D.; Wang, Y.; Jia, Y.; Zhang, Y.; Zhang, G.; Yan, Z.; Sun, X. *Applied Catalysis B: Environmental* **2020**, *274*, 119091.
- (192) El-Sawy, A. M.; Mosa, I. M.; Su, D.; Guild, C. J.; Khalid, S.; Joesten, R.; Rusling, J. F.; Suib, S. L. *Advanced Energy Materials* **2016**, *6*, 1501966.
- (193) Yang, R.; An, L.; Zhang, Y.; Zhang, N.; Dai, T.; Xi, P. *ChemCatChem* **2019**, *11*, 6002.
- (194) Xiao, X.; Li, X.; Wang, Z.; Yan, G.; Guo, H.; Hu, Q.; Li, L.; Liu, Y.; Wang, J. *Applied Catalysis B: Environmental* **2020**, *265*, 118603.
- (195) Li, W.; Xue, S.; Watzele, S.; Hou, S.; Fichtner, J.; Semrau, A. L.; Zhou, L.; Welle, A.; Bandarenka, A. S.; Fischer, R. A. *Angewandte Chemie - International Edition* **2020**, *59*, 5837.
- (196) Lee, D. U.; Park, M. G.; Cano, Z. P.; Ahn, W.; Chen, Z. *ChemSusChem* **2018**, *11*, 406.
- (197) Zhang, Z.; Cao, T.; Liu, S.; Duan, X.; Liu, L.-M.; Wang, S.; Liu, Y. *Particle & Particle Systems Characterization* **2017**, *34*, 1600207.
- (198) Lu, Y.-T.; Chien, Y.-J.; Liu, C.-F.; You, T.-H.; Hu, C.-C. *Journal of Materials Chemistry A* **2017**, *5*, 21016.
- (199) Arul, A.; Pak, H.; Moon, K. U.; Christy, M.; Oh, M. Y.; Nahm, K. S. *Applied Catalysis B: Environmental* **2018**, *220*, 488.
- (200) Wang, X.; Li, Y.; Jin, T.; Meng, J.; Jiao, L.; Zhu, M.; Chen, J. *Nano Letters* **2017**, *17*, 7989.
- (201) Cheng, W.; Yuan, P.; Lv, Z.; Guo, Y.; Qiao, Y.; Xue, X.; Liu, X.; Bai, W.; Wang, K.; Xu, Q.; Zhang, J. *Applied Catalysis B: Environmental* **2020**, *260*, 118198.

- (202) Hu, C.; Dai, L. *Advanced Materials* **2017**, *29*, 1604942.
- (203) Ma, L.; Chen, S.; Pei, Z.; Huang, Y.; Liang, G.; Mo, F.; Yang, Q.; Su, J.; Gao, Y.; Zapien, J. A.; Zhi, C. *ACS Nano* **2018**, *12*, 1949.
- (204) Chai, G.-L.; Qiu, K.; Qiao, M.; Titirici, M.-M.; Shang, C.; Guo, Z. *Energy & Environmental Science* **2017**, *10*, 1186.
- (205) Wan, K.; Luo, J.; Zhang, X.; Zhou, C.; Seo, J. W.; Subramanian, P.; Yan, J.-w.; Fransær, J. *Journal of Materials Chemistry A* **2019**, *7*, 19889.
- (206) Jia, Y.; Zhang, L.; Du, A.; Gao, G.; Chen, J.; Yan, X.; Brown, C. L.; Yao, X. *Advanced Materials* **2016**, *28*, 9532.
- (207) Li, Z.; Lv, L.; Wang, J.; Ao, X.; Ruan, Y.; Zha, D.; Hong, G.; Wu, Q.; Lan, Y.; Wang, C.; Jiang, J.; Liu, M. *Nano Energy* **2018**, *47*, 199.
- (208) Liu, L.; Su, H.; Tang, F.; Zhao, X.; Liu, Q. *Nano Energy* **2018**, *46*, 110.
- (209) Ji, D.; Sun, J.; Tian, L.; Chinnappan, A.; Zhang, T.; Jayathilaka, W. A. D. M.; Gosh, R.; Baskar, C.; Zhang, Q.; Ramakrishna, S. *Advanced Functional Materials* **2020**, *30*, 1910568.
- (210) Tang, C.; Zhong, L.; Zhang, B.; Wang, H. F.; Zhang, Q. *Advanced Materials* **2018**, *30*, 1705110
- (211) Chen, J.; Li, H.; Fan, C.; Meng, Q.; Tang, Y.; Qiu, X.; Fu, G.; Ma, T. *ACS Applied Materials & Interfaces* **2020**, *32*, e2003134.
- (212) Ding, J.; Wang, P.; Ji, S.; Wang, H.; Linkov, V.; Wang, R. *Electrochimica Acta* **2019**, *296*, 653.
- (213) Yan, S.; Xue, Y.; Li, S.; Shao, G.; Liu, Z. *ACS Applied Materials & Interfaces* **2019**, *11*, 25870.
